# Supplementary material for: Structure determination of liquid molecules by encapsulation in an aromatic cavity with hydrogen bonding and enhanced C–H⋯π interactions
Source: Royal Society of Chemistry journal article supplement (doi:10.1039/d2ce01033j), 2022-01-01
Supplement: d2ce01033j1.pdf [file d2ce01033j1.pdf]

## Supporting Information

### **Structure determination of liquid molecules by encapsulation in an aromatic cavity with hydrogen bonding and enhanced C–H··· $\pi$ interactions**

Shu-Qin Qin, Wei Xu, Wen-Cai Ye\*, Ren-Wang Jiang\*

Guangdong Province Key Laboratory of Pharmacodynamic Constituents of TCM and  
New Drugs Research, College of Pharmacy, Jinan University, Guangzhou 510632, P.  
R. China.

e-mails: [trwjiang@jnu.edu.cn](mailto:trwjiang@jnu.edu.cn), [chywc@aliyun.com](mailto:chywc@aliyun.com)

Tel: 8620-85221016; Fax: 8620-85221559

## Outline

### 1. Spectra of as-synthesized host

Fig. S1a  $^1\text{H}$ -NMR spectrum of guanidinium–biphenyldisulfonic acid (GNPS) (400 MHz, DMSO).

Fig. S1b  $^{13}\text{C}$ -NMR spectrum of guanidinium–biphenyldisulfonic acid (GNPS) (100 MHz, DMSO).

### 2. Crystallization methods.

### 3. Figures for the NMR and interactions of inclusion complexes

Fig. S2a  $^1\text{H}$ -NMR of (I) GNPS, (II) GNPS  $\supset$ 2 and (III)2 (400 MHz, DMSO-*d*6)

Fig. S2b C–H $\cdots$ O and N–H $\cdots$ O hydrogen bonds in GNPS  $\supset$ 2

Fig. S3a  $^1\text{H}$ -NMR of (I) GNPS, (II) GNPS  $\supset$ 3 and (III)3 (400 MHz, DMSO-*d*6)

Fig. S3b N–H $\cdots$ O interactions in GNPS  $\supset$ 3

Fig. S4a  $^1\text{H}$ -NMR of (I) GNPS, (II) GNPS  $\supset$ 4 and (III)4 (400 MHz, DMSO-*d*6)

Fig. S4b N–H $\cdots$ O interactions in GNPS  $\supset$ 4

Fig. S5a  $^1\text{H}$ -NMR of (I)GNPS, (II) GNPS  $\supset$ 5 and (III)5 (400 MHz, DMSO-*d*6)

Fig. S5b N–H $\cdots$ O hydrogen bonds in GNPS  $\supset$  5

Fig. S6a  $^1\text{H}$ -NMR of (I) GNPS, (II) GNPS  $\supset$ 6 and (III)6 (400 MHz, DMSO-*d*6)

Fig. S6b N–H $\cdots$ O hydrogen bonds in GNPS  $\supset$  6

Fig. S7a  $^1\text{H}$ -NMR of (I) GNPS, (II) GNPS  $\supset$ 7 and (III)7 (400 MHz, DMSO-*d*6)

Fig. S7b N–H $\cdots$ O and C–H $\cdots$ O hydrogen bonds in GNPS  $\supset$  7

Fig. S8a  $^1\text{H}$ -NMR of (I) GNPS, (II) GNPS  $\supset$ 8 and (III)8 (400 MHz, DMSO-*d*6)

Fig. S8b N–H $\cdots$ O and C–H $\cdots$ O hydrogen bonds in GNPS  $\supset$  8

Table S1. Changes of  $^1\text{H}$ -NMR chemical shifts of GNPS

#### **4. Supplementary Tables**

Table S2. C-H $\cdots\pi$  intermolecular interactions in host and guest

Table S3. Geometric parameters of the N-H $\cdots$ O, O-H $\cdots$ O, C-H $\cdots$ N and C-H $\cdots$ O hydrogen bonding interactions in the co-crystals

#### **5. Calculation of the nucleus-independent chemical shift (NICS) (DFT)**

#### **6. Guest volume calculations (DFT)**

7. Interaction Energies and the energy decomposition analysis (kJ/mol) based on Natural bond orbital (NBO) calculation.

## 1. Spectra of as-synthesized host

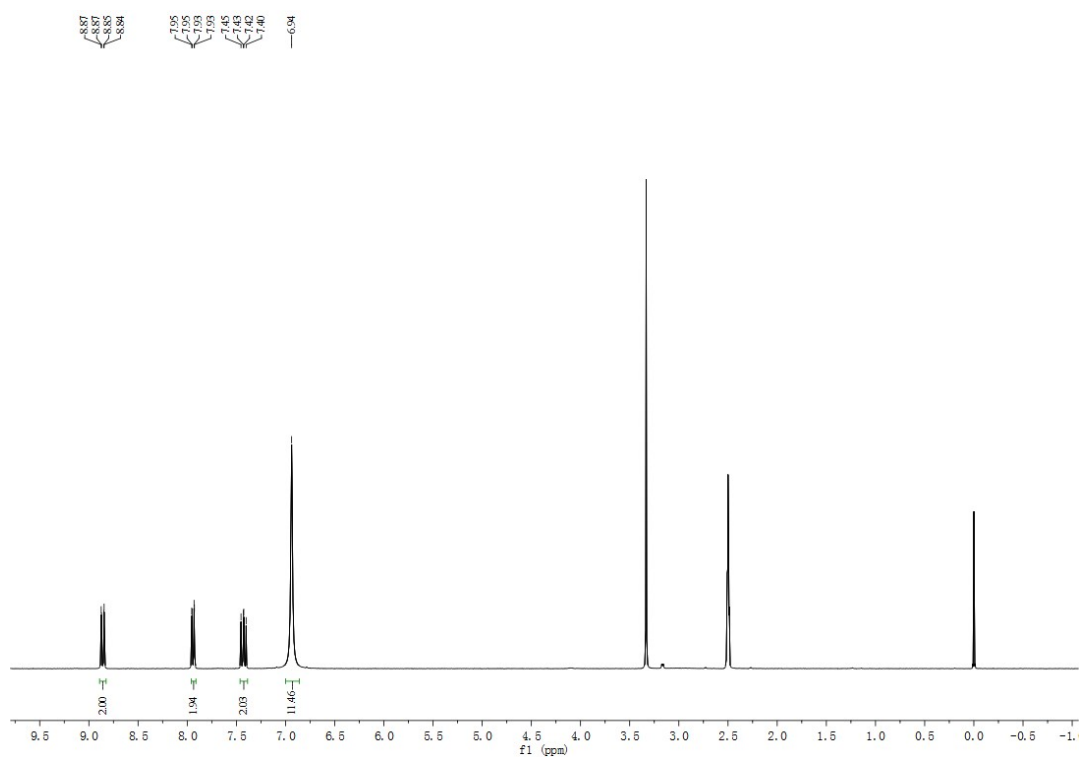

Fig. S1a  $^1\text{H}$ -NMR spectra of guanidinium-naphthalenedisulfonic acid (GNPS) (400 MHz, DMSO).

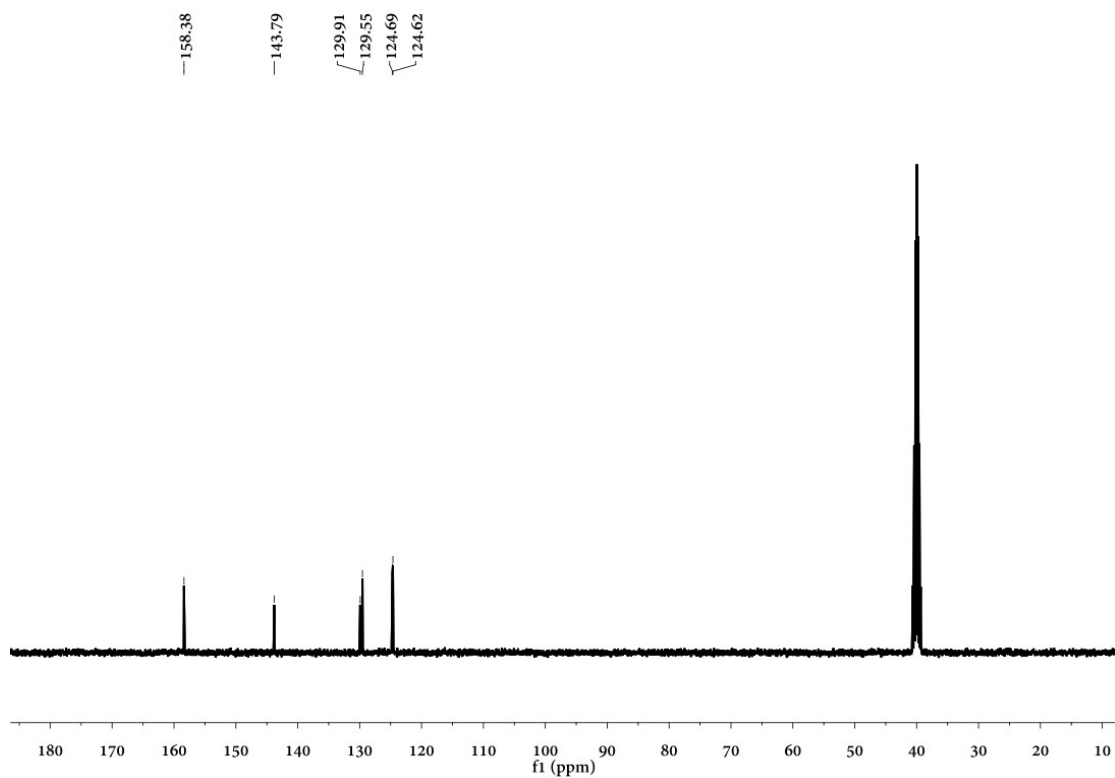

Fig. S1b  $^{13}\text{C}$ -NMR spectra of guanidinium-biphenyldisulfonic acid (GNPS) (100 MHz, DMSO).

## 2. Crystallization methods.

**Crystallization of GNPS  $\Rightarrow$ 1.** Slow evaporation of 1 mL methanol solution containing 1.7  $\mu\text{L}$  (0.01 mmol) of (-)-isopulegol and 4.08 mg (0.01 mmol) of Guanidinium–naphthalenedisulfonic acid (GNPS) apohost in a 2 mL transparent glass vial afforded colourless block-shaped single crystals within 1 day with the formula GNPS $\Rightarrow$ (-)-isopulegol (**GNPS $\Rightarrow$ 1**).

**Crystallization of GNPS  $\Rightarrow$ 2.** Slow evaporation of 1 mL methanol solution containing 2.1  $\mu\text{L}$  (0.01 mmol) of (-)-menthyl acetate and 4.08 mg (0.01 mmol) of Guanidinium–naphthalenedisulfonic acid (GNPS) apohost in a 2 mL transparent glass vial afforded colourless needle-shaped single crystals within 1 day with the formula GNPS $\Rightarrow$ (-)-menthyl acetate (**GNPS $\Rightarrow$ 2**).

**Crystallization of GNPS  $\Rightarrow$ 3.** Slow evaporation of 1 mL methanol solution containing 1.5  $\mu\text{L}$  (0.01 mmol) of isoeugenol and 4.08 mg (0.01 mmol) of Guanidinium–naphthalenedisulfonic acid (GNPS) apohost in a 2 mL transparent glass vial afforded colourless needle-shaped single crystals within 3 day with the formula GNPS $\Rightarrow$  isoeugenol (**GNPS $\Rightarrow$ 3**).

**Crystallization of GNPS  $\Rightarrow$ 4.** Slow evaporation of 1 mL methanol solution containing 1.3  $\mu\text{L}$  (0.01 mmol) of 2,6-dimethylaniline and 4.08 mg (0.01 mmol) of Guanidinium–naphthalenedisulfonic acid (GNPS) apohost in a 2 mL transparent glass vial afforded colourless block-shaped single crystals within 1 day with the formula GNPS $\Rightarrow$  2,6-dimethylaniline (**GNPS $\Rightarrow$ 4**).

**Crystallization of GNPS  $\Rightarrow$ 5.** Slow evaporation of 1 mL methanol solution containing 1.8  $\mu\text{L}$  (0.01 mmol) of methyleugenol and 4.08 mg (0.01 mmol) of Guanidinium–naphthalenedisulfonic acid (GNPS) apohost in a 2 mL transparent glass vial afforded colourless needle-shaped single crystals within 3 day with the formula GNPS $\Rightarrow$  methyleugenol (**GNPS $\Rightarrow$ 5**).

**Crystallization of GNPS  $\Rightarrow$ 6.** Slow evaporation of 1 mL methanol solution containing 1.9  $\mu\text{L}$  (0.01 mmol) of 2,6-diisopropylaniline and 4.08 mg (0.01 mmol) of Guanidinium–naphthalenedisulfonic acid (GNPS) apohost in a 2 mL transparent glass vial afforded colourless block-shaped single crystals within 1 day with the formula GNPS $\Rightarrow$  2,6-diisopropylaniline (**GNPS $\Rightarrow$ 6**).

**Crystallization of GNPS  $\Rightarrow$ 7.** Slow evaporation of 1 mL methanol solution containing 1.3  $\mu\text{L}$  (0.01 mmol) of methyl salicylate and 4.08 mg (0.01 mmol) of

Guanidinium–naphthalenedisulfonic acid (GNPS) apohost in a 2 mL transparent glass vial afforded colourless block-shaped single crystals within 1 day with the formula GNPS $\supset$  methyl salicylate (**GNPS $\supset$ 7**).

**Crystallization of GNPS  $\supset$ 8.** Slow evaporation of 1 mL methanol solution containing 1.6  $\mu$ L (0.01 mmol) of L(-)-carvone and 4.08 mg (0.01 mmol) of Guanidinium–naphthalenedisulfonic acid (GNPS) apohost in a 2 mL transparent glass vial afforded colourless block-shaped single crystals within 1 day with the formula GNPS $\supset$  L(-)-carvone (**GNPS $\supset$ 8**).

### 3. Figures for the NMR and interactions of inclusion complexes

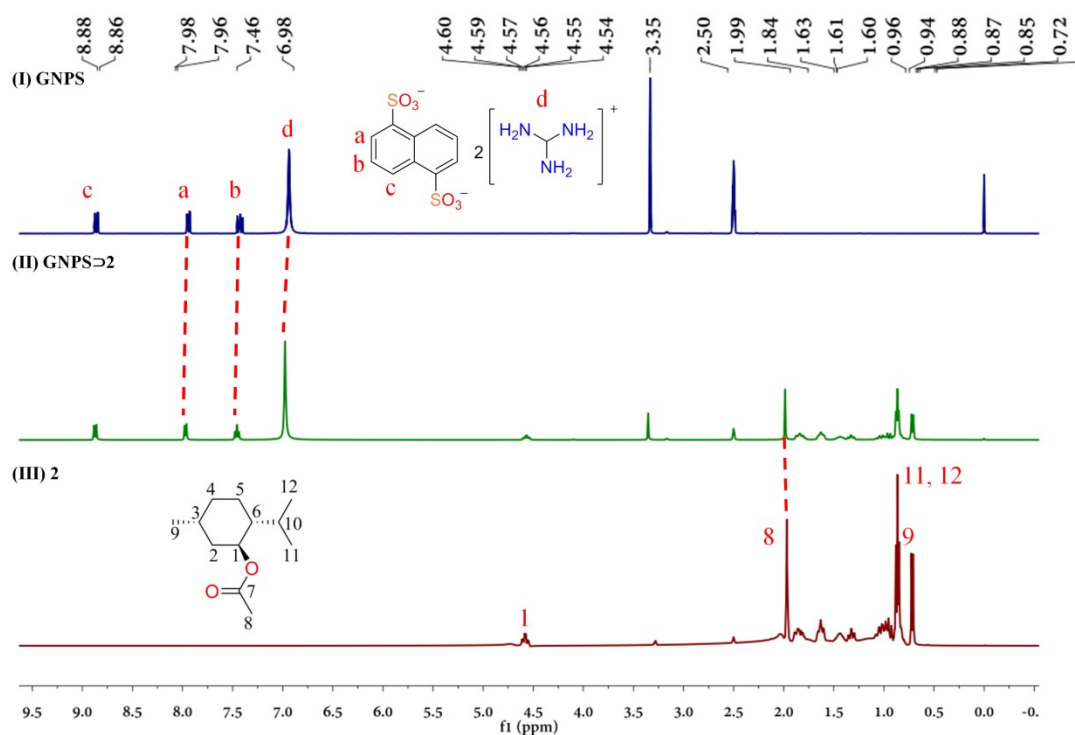

Fig. S2a  $^1\text{H-NMR}$  of (I) GNPS, (II) GNPS ⇌ 2 and (III) 2 (400 MHz, DMSO)

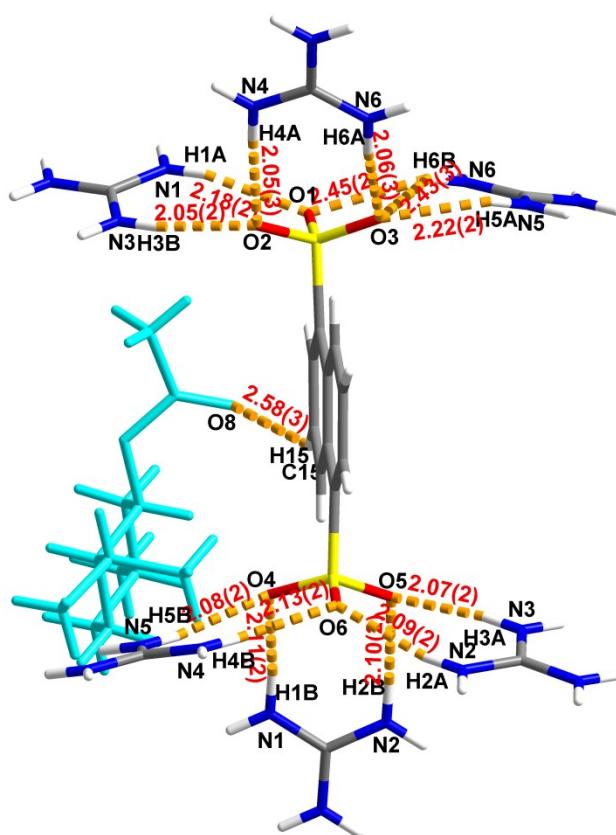

Fig. S2b N-H...O and C-H...O hydrogen bonds in GNPS ⇌ 2

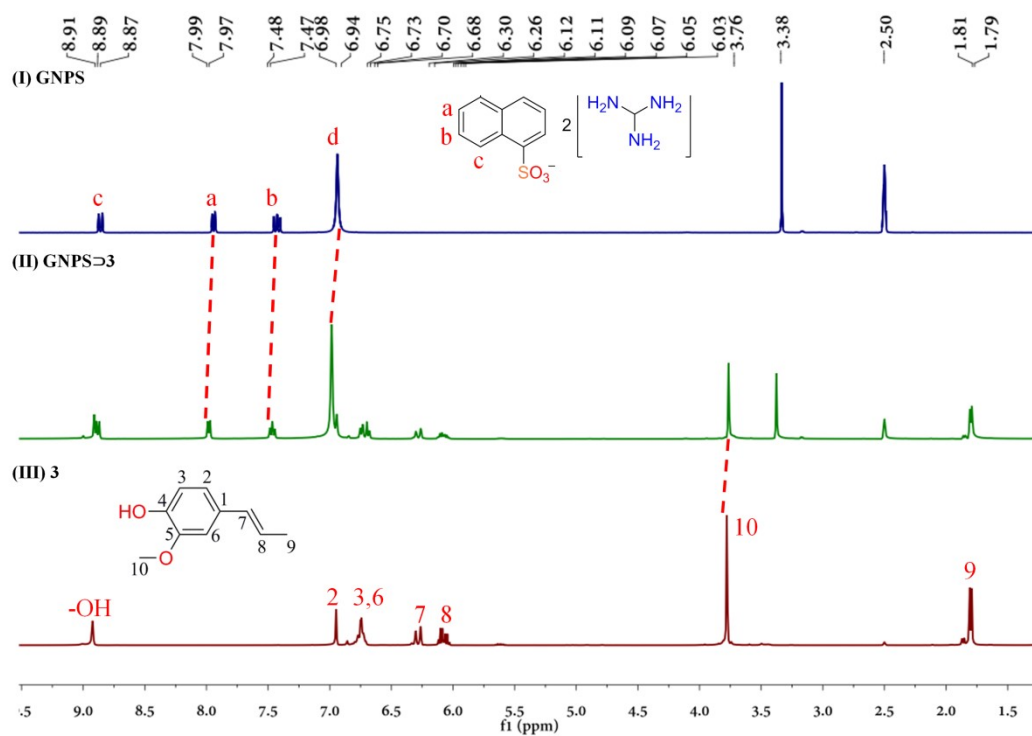

Fig. S3a  $^1\text{H-NMR}$  of (I) GNPS, (II) GNPS ⇌ 3 and (III) 3 (400 MHz, DMSO)

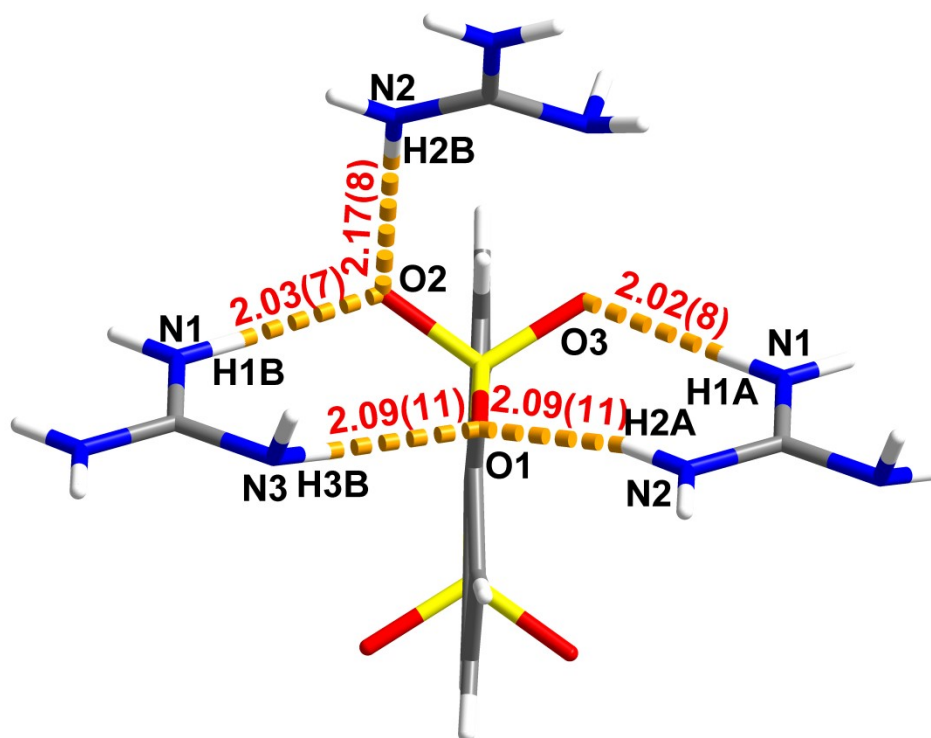

Fig. S3b N-H...O hydrogen bonds in GNPS ⇌ 3



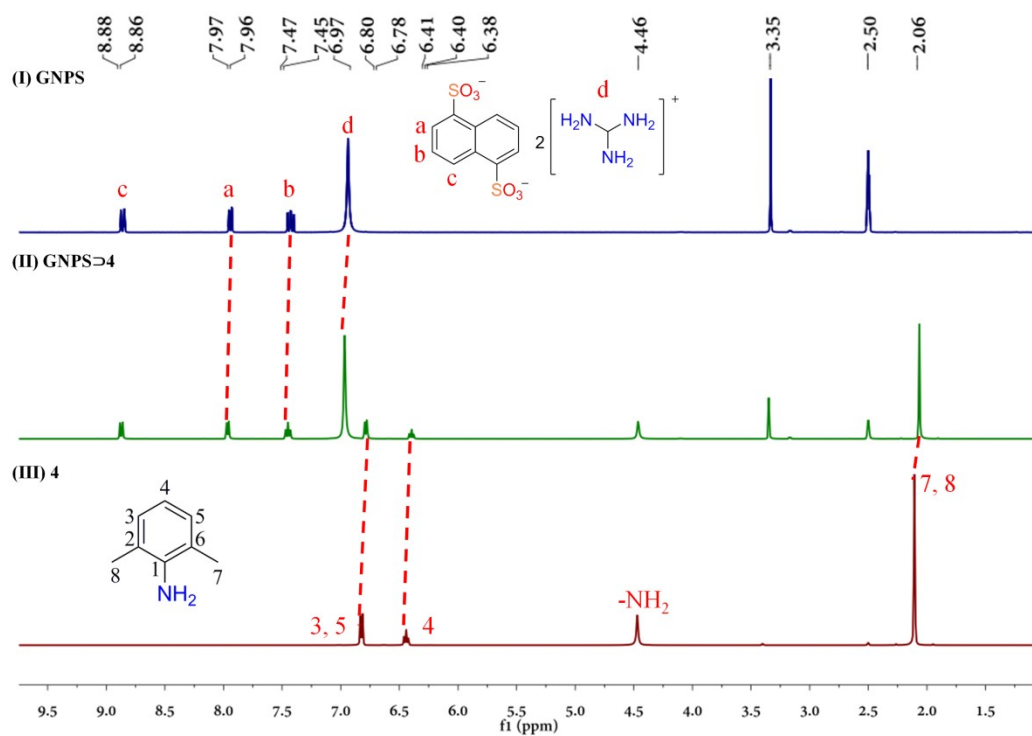

Fig. S4a  $^1\text{H-NMR}$  of (I) GNPS, (II) GNPS=4 and (III)4 (400 MHz, DMSO)

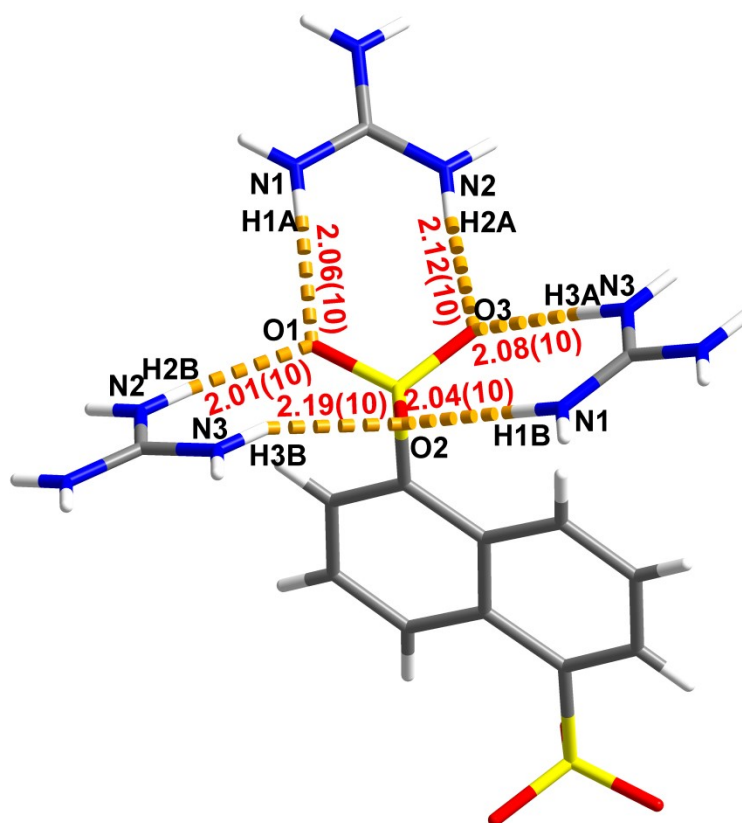

Fig. S4b N-H $\cdots$ O interactions in GNPS=4

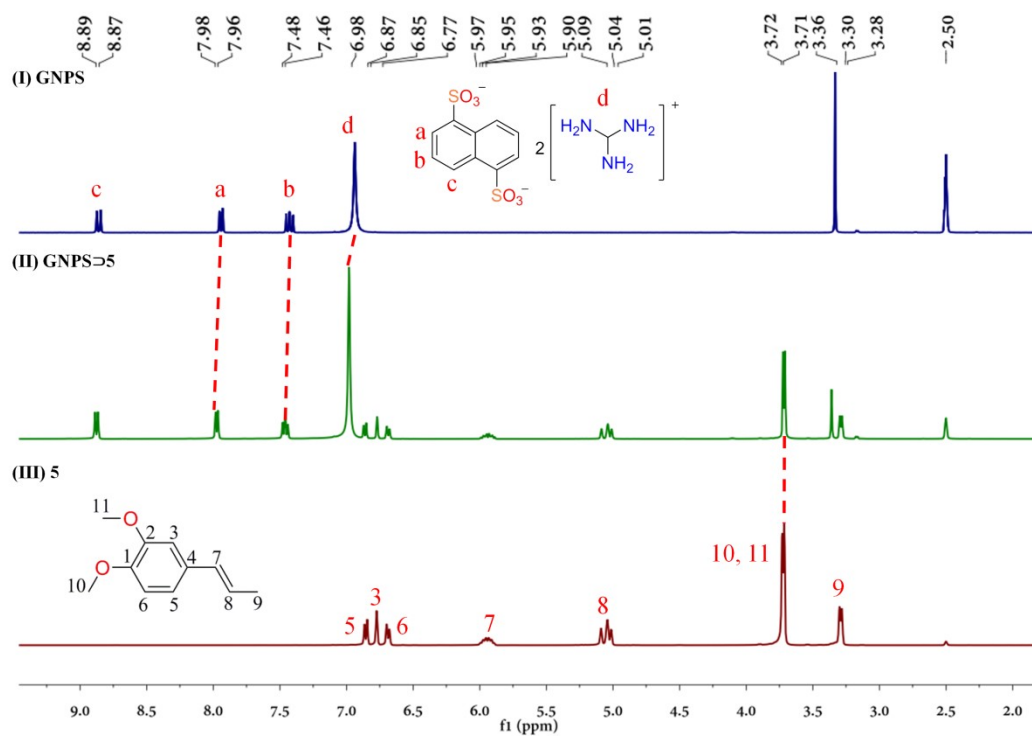

Fig. S5a  $^1\text{H-NMR}$  of (I)GNPS, (II)GNPS ⇨5 and (III)5 (400 MHz, DMSO).

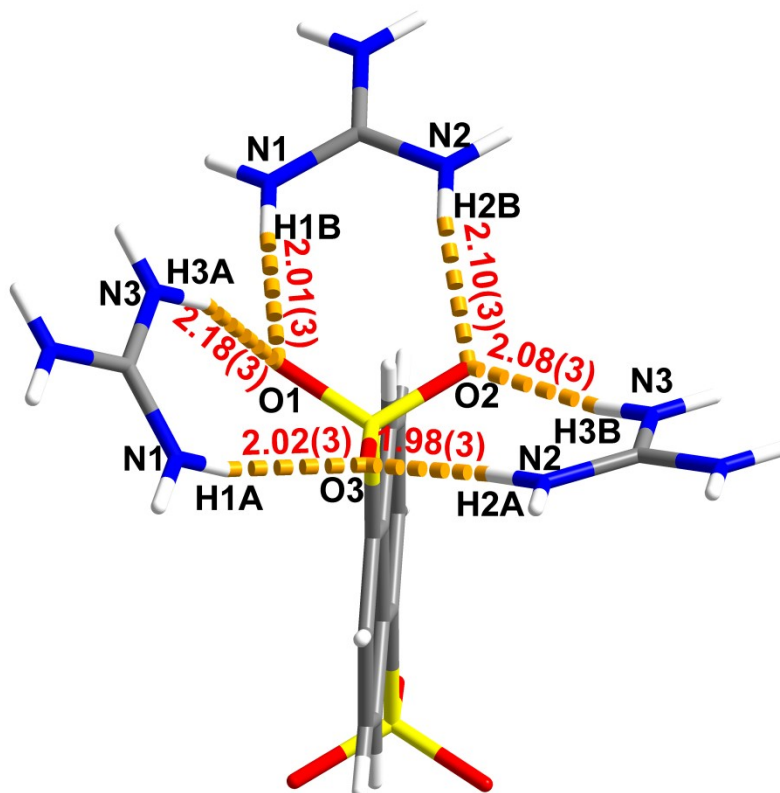

Fig. S5b N-H...O hydrogen bonds in GNPS ⇨5

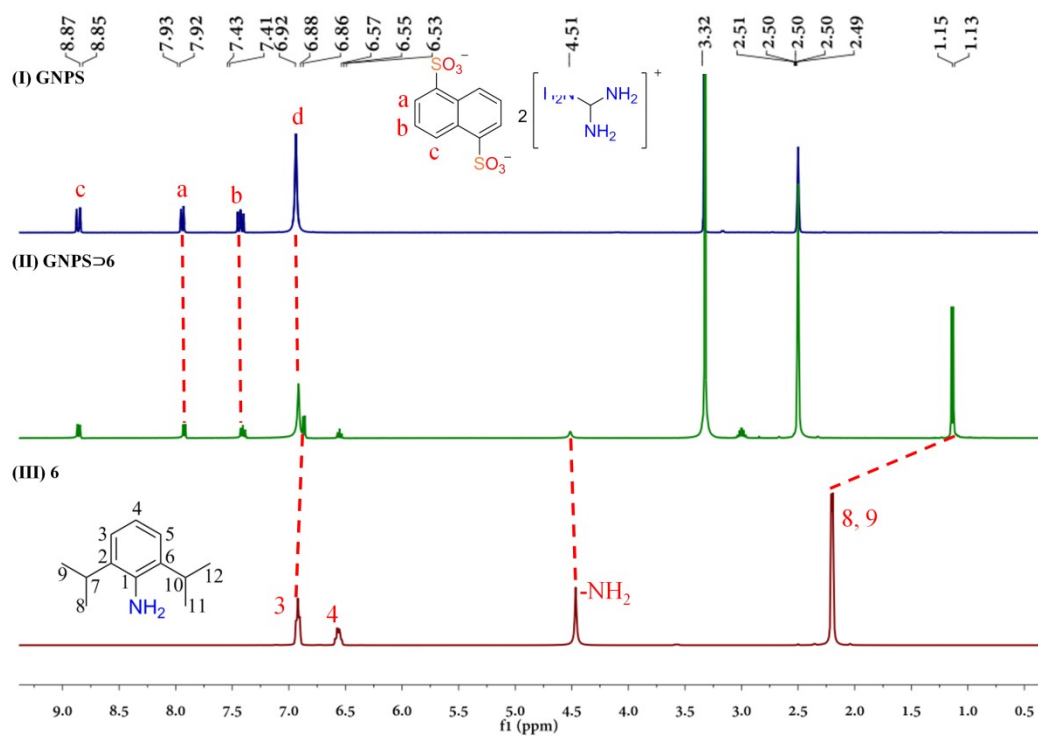

Fig. S6a  $^1\text{H-NMR}$  of (I) GNPS, (II) GNPS  $\supset$ 6 and (III) 6 (400 MHz, DMSO)

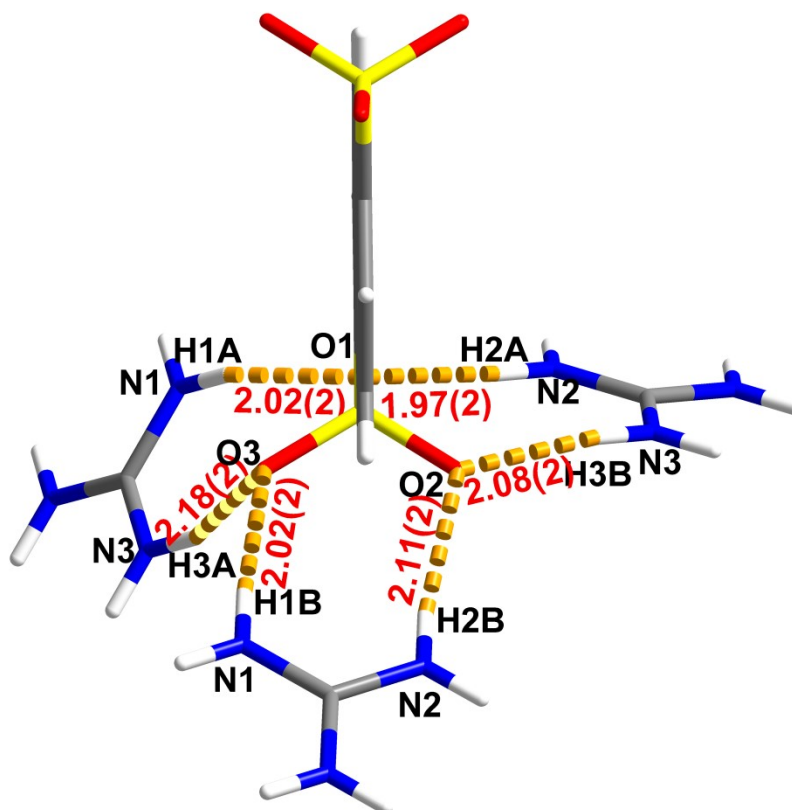

Fig. S6b N-H...O hydrogen bonds in GNPS  $\supset$  6

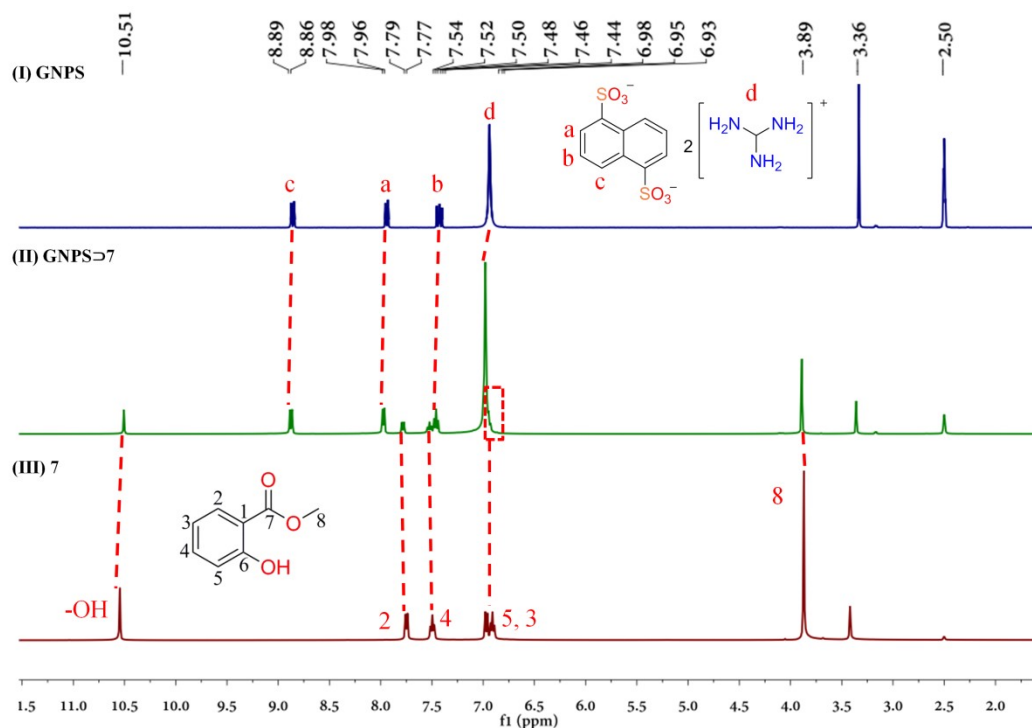

Fig. S7a  $^1\text{H-NMR}$  of (I) GNPS, (II) GNPS  $\supset$ 7 and (III)7 (400 MHz, DMSO)

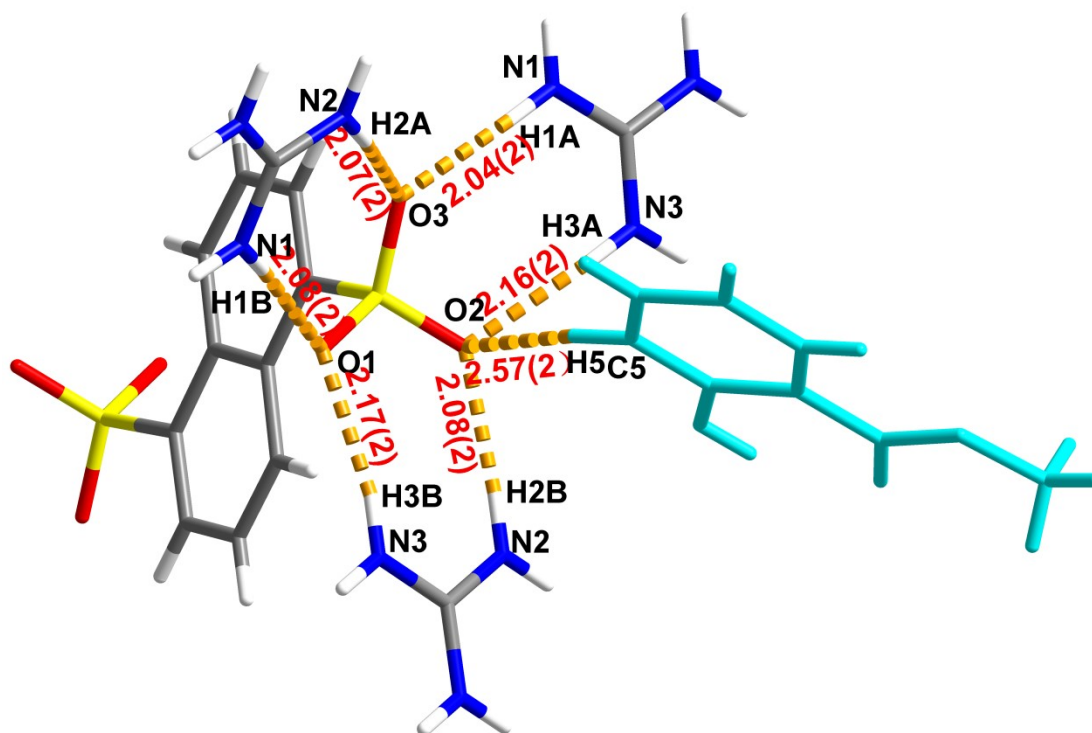

Fig. S7b N-H $\cdots$ O and C-H $\cdots$ O hydrogen bonds in GNPS  $\supset$ 7

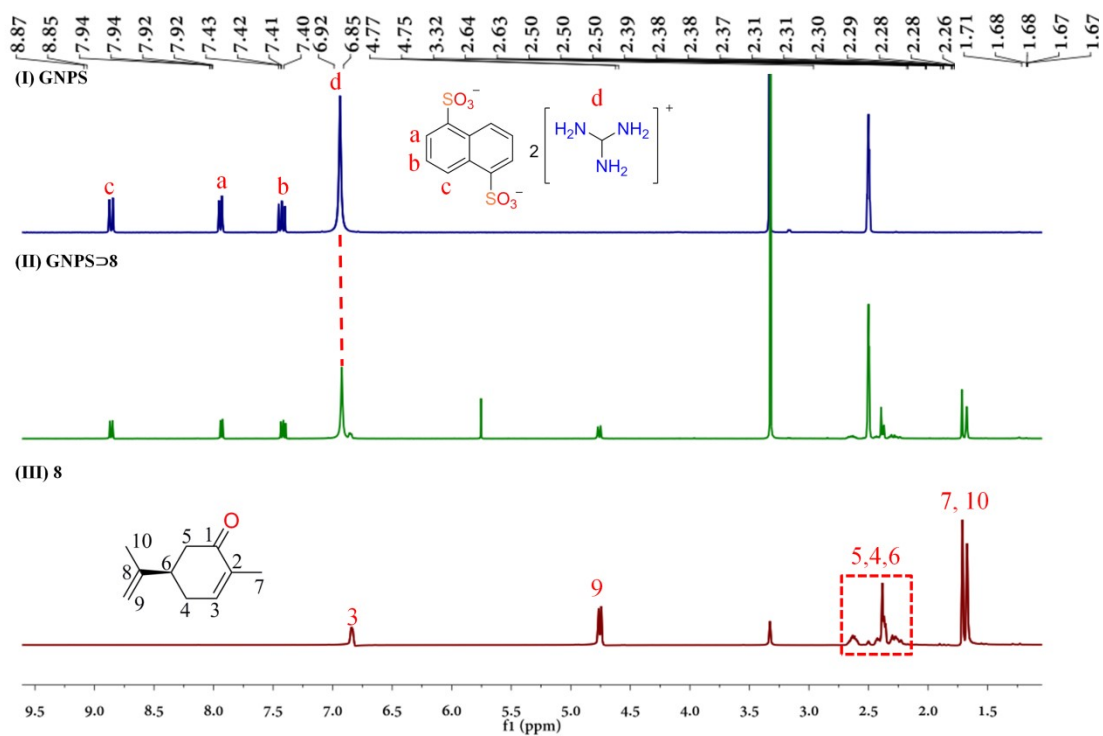

Fig. S8a  $^1\text{H-NMR}$  of (I) GNPS, (II) GNPS  $\rightarrow$  8 and (III) 8 (400 MHz, DMSO)

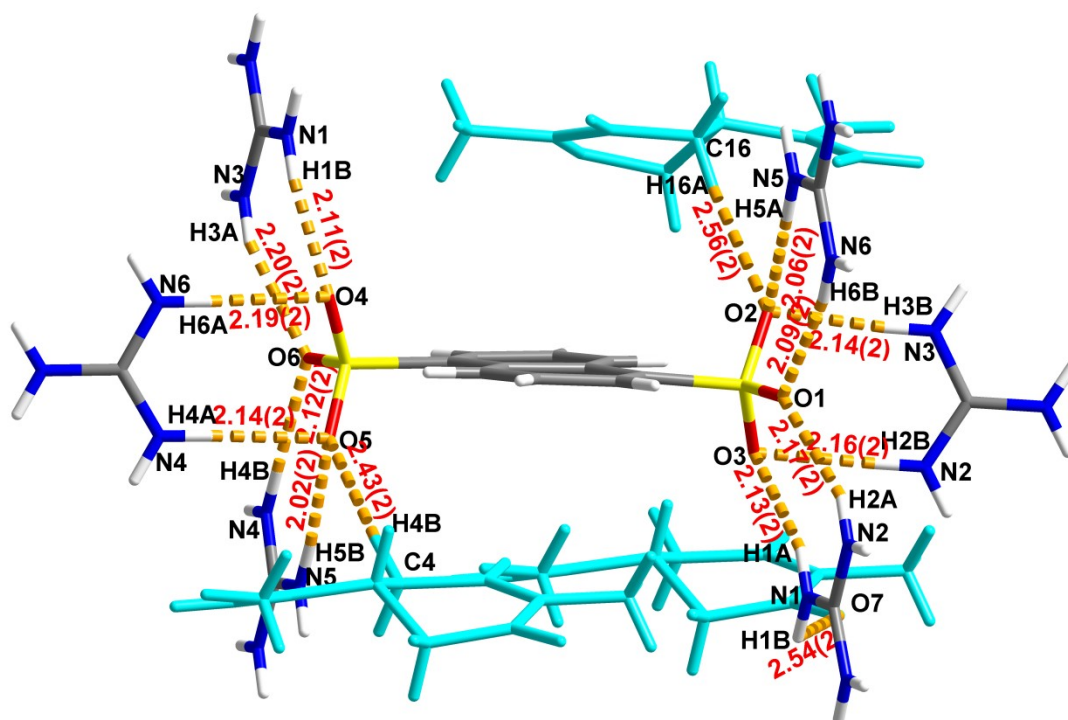

Fig. S8b N-H $\cdots$ O and C-H $\cdots$ O hydrogen bonds in GNPS  $\rightarrow$  8

## 4. Supplementary Tables

Table S1. Changes of <sup>1</sup>H-NMR chemical shifts of GNPS

| δ/ppm     | GNPS | GNPS▷1     | GNPS▷2     | GNPS▷3     | GNPS▷4     | GNPS▷5     | GNPS▷6      | GNPS▷7      | GNPS▷8     |
|-----------|------|------------|------------|------------|------------|------------|-------------|-------------|------------|
| <b>Ha</b> | 7.95 | 7.98(0.03) | 7.98(0.03) | 7.99(0.04) | 7.98(0.03) | 7.98(0.03) | 7.94(-0.01) | 7.93(-0.02) | 7.97(0.02) |
| <b>Hb</b> | 7.43 | 7.46(0.03) | 7.46(0.03) | 7.47(0.04) | 7.46(0.03) | 7.46(0.03) | 7.42(-0.01) | 7.41(-0.02) | 7.45(0.02) |
| <b>Hc</b> | 8.87 | 8.88(0.01) | 8.89(0.02) | 8.89(0.02) | 8.88(0.01) | 8.89(0.02) | 8.87(0.00)  | 8.87(0.00)  | 8.88(0.01) |
| <b>Hd</b> | 6.94 | 6.98(0.04) | 6.98(0.04) | 6.98(0.04) | 6.98(0.04) | 6.98(0.04) | 6.92(-0.02) | 6.92(-0.02) | 7.97(0.03) |

Table S2. C-H⋯π intermolecular interactions in Host and Guest

| Host-Guest    | X-H⋯Cg                                            | H⋯Cg(Å) | X-H⋯Cg(°) | X⋯Cg(Å) |
|---------------|---------------------------------------------------|---------|-----------|---------|
| <b>GNPS▷1</b> | C <sub>9</sub> -H <sub>9</sub> A⋯Cg2 <sup>a</sup> | 2.98(1) | 155       | 3.87(6) |

Symmetry codes: <sup>a</sup> 1-X,-1/2+Y,3/2-Z; Cg2 is the centroid of C15, C16, C17, C18, C19 and C20.

| Host-Guest    | X-H⋯Cg                                            | H⋯Cg(Å) | X-H⋯Cg(°) | X⋯Cg(Å) |
|---------------|---------------------------------------------------|---------|-----------|---------|
| <b>GNPS▷2</b> | C <sub>3</sub> -H <sub>3</sub> ⋯Cg2 <sup>a</sup>  | 2.59(1) | 162       | 3.54(3) |
|               | C <sub>4</sub> -H <sub>4</sub> A⋯Cg1 <sup>b</sup> | 2.61(1) | 164       | 3.56(3) |

Symmetry codes: <sup>a</sup> -1+X,Y,Z; <sup>b</sup> -X,-1/2+Y,1/2-Z; Cg1 is the centroid of C13, C14, C15, C16, C17 and C18. Cg2 is the centroid of C17, C18, C19, C20, C21 and C22.

| Host-Guest    | X-H⋯Cg                                           | H⋯Cg(Å) | X-H⋯Cg(°) | X⋯Cg(Å) |
|---------------|--------------------------------------------------|---------|-----------|---------|
| <b>GNPS▷3</b> | C <sub>7</sub> -H <sub>7</sub> ⋯Cg2 <sup>a</sup> | 2.39(1) | 154       | 3.25(3) |

Symmetry codes: <sup>a</sup> X,Y,-1+Z; Cg2 is the centroid of C11, C12, C13, C13, C12 and C11;

| Host-Guest    | X-H⋯Cg                                           | H⋯Cg(Å) | X-H⋯Cg(°) | X⋯Cg(Å) |
|---------------|--------------------------------------------------|---------|-----------|---------|
| <b>GNPS▷4</b> | C <sub>3</sub> -H <sub>3</sub> ⋯Cg1 <sup>a</sup> | 2.90(1) | 150       | 3.73(6) |
|               | C <sub>9</sub> -H <sub>9</sub> ⋯Cg4 <sup>a</sup> | 2.80(1) | 124       | 3.41(6) |

Symmetry codes: <sup>a</sup> 1/2+X,1/2-Y,1-Z; Cg4 is the centroid of C9, C10, C11, C11, C12 and C13; Cg4 is the centroid of C1, C2, C3, C4, C5 and C6.

| Host-Guest    | X-H⋯Cg                                              | H⋯Cg(Å) | X-H⋯Cg(°) | X⋯Cg(Å)  |
|---------------|-----------------------------------------------------|---------|-----------|----------|
| <b>GNPS▷5</b> | C <sub>16</sub> -H <sub>16</sub> ⋯Cg4 <sup>a</sup>  | 2.81(0) | 148       | 3.64(4)  |
|               | C <sub>9</sub> -H <sub>9</sub> A⋯Cg5 <sup>b</sup>   | 2.99(1) | 122       | 3.59(2)  |
|               | C <sub>11</sub> -H <sub>11</sub> B⋯Cg5 <sup>c</sup> | 2.71(1) | 144       | 3.53(12) |

Symmetry codes: <sup>a</sup> X,1+Y,Z; <sup>b</sup> 5/2-X,-1/2+Y,Z; <sup>c</sup> 3/2-X,-1/2+Y,Z; Cg4 is the centroid of C1, C2, C3, C4, C5 and C6; Cg5 is the centroid of C12, C13, C14, C14, C15 and C16.

| Host-Guest       | X-H...Cg                                             | H...Cg(Å) | X-H...Cg(°) | X...Cg(Å) |
|------------------|------------------------------------------------------|-----------|-------------|-----------|
| GNPS $\supset$ 6 | C <sub>14</sub> -H <sub>14</sub> ...Cg2 <sup>a</sup> | 2.81(2)   | 149         | 3.64(3)   |
|                  | C <sub>8</sub> -H <sub>8</sub> B...Cg1 <sup>b</sup>  | 2.97(2)   | 148         | 3.82(14)  |
|                  | C <sub>9</sub> -H <sub>9</sub> B...Cg1 <sup>c</sup>  | 2.66(2)   | 171         | 3.62(9)   |

Symmetry codes: <sup>a</sup> 3/2-X,1/2+Y,Z; <sup>b</sup> X,Y,Z; <sup>c</sup> 1-X,1-Y,1-Z; Cg1 is the centroid of C13, C14, C15, C16, C17 and C17. Cg2 is the centroid of C1, C2, C3, C4, C5 and C6.

| Host-Guest       | X-H...Cg                                              | H...Cg(Å) | X-H...Cg(°) | X...Cg(Å) |
|------------------|-------------------------------------------------------|-----------|-------------|-----------|
| GNPS $\supset$ 7 | C <sub>14</sub> -H <sub>14</sub> C...Cg1 <sub>a</sub> | 3.23(1)   | 153         | 4.11(37)  |

Symmetry codes: <sup>a</sup> 1/2+X,1/2-Y,1-Z; Cg4 is the centroid of C1, C2, C3, C3, C4 and C5.

| Host-Guest       | X-H...Cg                                              | H...Cg(Å) | X-H...Cg(°) | X...Cg(Å) |
|------------------|-------------------------------------------------------|-----------|-------------|-----------|
| GNPS $\supset$ 8 | C <sub>10</sub> -H <sub>10</sub> C...Cg2 <sub>b</sub> | 2.90(0)   | 131         | 3.60(3)   |

Symmetry codes: <sup>a</sup> 1/2-X,-Y,1/2+Z; Cg2 is the centroid of C15, C16, C17, C18, C19 and C20.

Table S3. Geometric parameters of the N-H...O, O-H...O, C-H...N and C-H...O hydrogen bonding interactions in the co-crystals

| H-G              | Interactions                                          | D-H (Å) | D...A (Å) | H...A (Å) | D-H...A (deg) | Symmetry code     |
|------------------|-------------------------------------------------------|---------|-----------|-----------|---------------|-------------------|
| GNPS             | N <sub>1</sub> -H <sub>1</sub> A...O <sub>2</sub> W   | 0.860   | 2.14(5)   | 2.91(6)   | 148           | 1-x,1-y,2-z       |
|                  | N <sub>1</sub> -H <sub>1</sub> B...O <sub>1</sub>     | 0.860   | 2.09(4)   | 2.92(7)   | 164           | 1+x,y,z           |
|                  | N <sub>2</sub> -H <sub>2</sub> A...O <sub>2</sub> W   | 0.860   | 2.15(4)   | 2.91(6)   | 148           | 1-x,1-y,2-z       |
|                  | N <sub>2</sub> -H <sub>2</sub> B...O <sub>1</sub>     | 0.860   | 2.15(4)   | 3.01(7)   | 171           | x, y, z           |
|                  | N <sub>3</sub> -H <sub>3</sub> A...O <sub>3</sub>     | 0.860   | 2.22(4)   | 3.05(7)   | 163           | 1+x,y,z           |
|                  | N <sub>3</sub> -H <sub>3</sub> B...O <sub>2</sub>     | 0.860   | 2.04(4)   | 2.88(7)   | 168           | x, y, z           |
|                  | O <sub>1</sub> W-H <sub>1</sub> WA...O <sub>3</sub>   | 0.850   | 2.01(4)   | 2.84(5)   | 165           | x, y, z           |
|                  | O <sub>1</sub> W-H <sub>1</sub> WB...O <sub>3</sub>   | 0.850   | 2.08(4)   | 2.91(6)   | 164           | -x,1-y,1-z        |
|                  | O <sub>2</sub> W-H <sub>2</sub> WA...O <sub>1</sub> W | 0.850   | 1.97(4)   | 2.80(6)   | 168           | x, y, z           |
|                  | O <sub>2</sub> W-H <sub>2</sub> WB...O <sub>1</sub> W | 0.850   | 2.12(5)   | 2.92(6)   | 156           | -x,-y,1-z         |
| GNPS $\supset$ 1 | N <sub>1</sub> -H <sub>1</sub> A...O <sub>7</sub>     | 0.860   | 2.07(3)   | 2.93(4)   | 175           | -1/2+x,3/2-y,1-z  |
|                  | N <sub>1</sub> -H <sub>1</sub> B...O <sub>6</sub>     | 0.860   | 2.04(4)   | 2.88(4)   | 168           | -x,1/2+y,3/2-z    |
|                  | N <sub>2</sub> -H <sub>2</sub> A...O <sub>5</sub>     | 0.860   | 2.15(3)   | 3.00(4)   | 168           | -x,1/2+y,3/2-z    |
|                  | N <sub>2</sub> -H <sub>2</sub> B...O <sub>1</sub>     | 0.860   | 2.11(2)   | 2.96(4)   | 169           | x, y, z           |
|                  | N <sub>3</sub> -H <sub>3</sub> A...O <sub>3</sub>     | 0.860   | 2.17(3)   | 2.99(4)   | 161           | -1/2+x,3/2-y,1-z  |
|                  | N <sub>3</sub> -H <sub>3</sub> B...O <sub>2</sub>     | 0.860   | 2.02(3)   | 2.86(4)   | 166           | x, y, z           |
|                  | N <sub>4</sub> -H <sub>4</sub> A...O <sub>1</sub> W   | 0.860   | 2.07(3)   | 2.90(5)   | 164           | x, y, z           |
|                  | N <sub>4</sub> -H <sub>4</sub> B...O <sub>5</sub>     | 0.860   | 2.26(2)   | 3.09(4)   | 162           | -1/2-x,1-y,-1/2+z |

|                                                   |                                                     |                                                   |          |          |          |                     |
|---------------------------------------------------|-----------------------------------------------------|---------------------------------------------------|----------|----------|----------|---------------------|
|                                                   | N <sub>5</sub> -H <sub>5</sub> A···O <sub>7</sub>   | 0.860                                             | 2.05(3)  | 2.83(4)  | 150      | x, y, z             |
|                                                   | N <sub>5</sub> -H <sub>5</sub> B···O <sub>4</sub>   | 0.860                                             | 2.08(3)  | 2.94(4)  | 174      | -x,-1/2+y,3/2-z     |
|                                                   | N <sub>6</sub> -H <sub>6</sub> A···O <sub>6</sub>   | 0.860                                             | 2.05(3)  | 2.90(4)  | 169      | -x,-1/2+y,3/2-z     |
|                                                   | N <sub>6</sub> -H <sub>6</sub> B···O <sub>4</sub>   | 0.860                                             | 2.26(2)  | 3.10(4)  | 166      | -1/2-x,1-y,-1/2+z   |
|                                                   | O <sub>1</sub> W-H <sub>1</sub> WA···O <sub>2</sub> | 0.850                                             | 2.04(3)  | 2.86(4)  | 160      | x, y, z             |
|                                                   | O <sub>1</sub> W-H <sub>1</sub> WB···O <sub>1</sub> | 0.850                                             | 2.22(2)  | 3.06(4)  | 172      | -1/2+x,3/2-y,1-z    |
|                                                   | O <sub>7</sub> -H <sub>7</sub> ···O <sub>3</sub>    | 0.820                                             | 1.94(3)  | 2.75(4)  | 171      | x, y, z             |
| GNPS▷2                                            | N <sub>1</sub> -H <sub>1</sub> A···O <sub>1</sub>   | 0.860                                             | 2.18(2)  | 2.99(3)  | 157      | x, y, z             |
|                                                   | N <sub>1</sub> -H <sub>1</sub> B···O <sub>4</sub>   | 0.860                                             | 2.11(2)  | 2.94(3)  | 161      | 1/2-x,1-y,1/2+z     |
|                                                   | N <sub>2</sub> -H <sub>2</sub> A···O <sub>6</sub>   | 0.860                                             | 2.09(2)  | 2.93(3)  | 166      | 1-x,-1/2+y,1/2-z    |
|                                                   | N <sub>2</sub> -H <sub>2</sub> B···O <sub>5</sub>   | 0.860                                             | 2.10(2)  | 2.94(4)  | 168      | 1/2-x,1-y,1/2+z     |
|                                                   | N <sub>3</sub> -H <sub>3</sub> A···O <sub>5</sub>   | 0.860                                             | 2.07(2)  | 2.92(3)  | 173      | 1-x,-1/2+y,1/2-z    |
|                                                   | N <sub>3</sub> -H <sub>3</sub> B···O <sub>2</sub>   | 0.860                                             | 2.05(2)  | 2.90(3)  | 169      | x, y, z             |
|                                                   | N <sub>4</sub> -H <sub>4</sub> A···O <sub>2</sub>   | 0.860                                             | 2.05(3)  | 2.89(4)  | 169      | x, y, z             |
|                                                   | N <sub>4</sub> -H <sub>4</sub> B···O <sub>6</sub>   | 0.860                                             | 2.13(2)  | 2.97(3)  | 166      | 3/2-x,1-y,1/2+z     |
|                                                   | N <sub>5</sub> -H <sub>5</sub> A···O <sub>3</sub>   | 0.860                                             | 2.22(2)  | 2.99(3)  | 148      | 1/2+x,3/2-y,1-z     |
|                                                   | N <sub>5</sub> -H <sub>5</sub> B···O <sub>4</sub>   | 0.860                                             | 2.08(2)  | 2.92(3)  | 166      | 3/2-x,1-y,1/2+z     |
|                                                   | N <sub>6</sub> -H <sub>6</sub> A···O <sub>3</sub>   | 0.860                                             | 2.06(3)  | 2.91(5)  | 171      | x, y, z             |
|                                                   | N <sub>6</sub> -H <sub>6</sub> B···O <sub>1</sub>   | 0.860                                             | 2.45(2)  | 3.18(3)  | 142      | 1/2+x,3/2-y,1-z     |
|                                                   | N <sub>6</sub> -H <sub>6</sub> B···O <sub>3</sub>   | 0.860                                             | 2.43(3)  | 3.14(4)  | 142      | 1/2+x,3/2-y,1-z     |
|                                                   | C <sub>15</sub> -H <sub>15</sub> ···O <sub>8</sub>  | 0.930                                             | 2.58(3)  | 3.24(4)  | 129      | x, y, z             |
|                                                   | GNPS▷3                                              | N <sub>1</sub> -H <sub>1</sub> A···O <sub>3</sub> | 0.860    | 2.02(8)  | 2.88(15) | 175                 |
| N <sub>1</sub> -H <sub>1</sub> B···O <sub>2</sub> |                                                     | 0.860                                             | 2.03(7)  | 2.89(15) | 175      | x,y,-1+z            |
| N <sub>2</sub> -H <sub>2</sub> A···O <sub>1</sub> |                                                     | 0.860                                             | 2.09(11) | 2.93(15) | 164      | x, y, z             |
| N <sub>2</sub> -H <sub>2</sub> B···O <sub>2</sub> |                                                     | 0.860                                             | 2.17(8)  | 2.99(14) | 158      | 1/2+x,-1/2-y,-1/2+z |
| N <sub>3</sub> -H <sub>3</sub> B···O <sub>1</sub> |                                                     | 0.860                                             | 2.09(11) | 2.93(14) | 165      | x,y,-1+z            |
| GNPS▷4                                            | N <sub>1</sub> -H <sub>1</sub> A···O <sub>1</sub>   | 0.860                                             | 2.06(10) | 2.92(17) | 176      | 1/2-x,1/2+y,z       |
|                                                   | N <sub>1</sub> -H <sub>1</sub> B···O <sub>2</sub>   | 0.860                                             | 2.04(10) | 2.90(17) | 178      | 1-x,1/2+y,3/2-z     |
|                                                   | N <sub>2</sub> -H <sub>2</sub> A···O <sub>3</sub>   | 0.860                                             | 2.12(10) | 2.97(16) | 167      | 1/2-x,1/2+y,z       |
|                                                   | N <sub>2</sub> -H <sub>2</sub> B···O <sub>1</sub>   | 0.860                                             | 2.01(10) | 2.87(17) | 172      | x, y, z             |
|                                                   | N <sub>3</sub> -H <sub>3</sub> A···O <sub>3</sub>   | 0.860                                             | 2.08(10) | 2.95(16) | 176      | 1-x,1/2+y,3/2-z     |
|                                                   | N <sub>3</sub> -H <sub>3</sub> B···O <sub>2</sub>   | 0.860                                             | 2.19(10) | 3.01(16) | 159      | x, y, z             |
| GNPS▷5                                            | N <sub>1</sub> -H <sub>1</sub> A···O <sub>3</sub>   | 0.860                                             | 2.02(3)  | 2.85(5)  | 162      | -1/2+x,y,1/2-z      |
|                                                   | N <sub>1</sub> -H <sub>1</sub> B···O <sub>1</sub>   | 0.860                                             | 2.01(3)  | 2.86(4)  | 174      | 2-x,-1/2+y,1/2-z    |
|                                                   | N <sub>2</sub> -H <sub>2</sub> A···O <sub>3</sub>   | 0.860                                             | 1.98(3)  | 2.84(4)  | 176      | x, y, z             |
|                                                   | N <sub>2</sub> -H <sub>2</sub> B···O <sub>2</sub>   | 0.860                                             | 2.10(3)  | 2.94(4)  | 164      | 2-x,-1/2+y,1/2-z    |
|                                                   | N <sub>3</sub> -H <sub>3</sub> A···O <sub>1</sub>   | 0.860                                             | 2.18(3)  | 2.99(4)  | 158      | -1/2+x,y,1/2-z      |
|                                                   | N <sub>3</sub> -H <sub>3</sub> B···O <sub>2</sub>   | 0.860                                             | 2.08(3)  | 2.94(5)  | 172      | x, y, z             |
| GNPS▷6                                            | N <sub>1</sub> -H <sub>1</sub> A···O <sub>1</sub>   | 0.860                                             | 2.02(2)  | 2.85(2)  | 163      | -1/2+x,y,3/2-z      |
|                                                   | N <sub>1</sub> -H <sub>1</sub> B···O <sub>3</sub>   | 0.860                                             | 2.02(2)  | 2.87(3)  | 174      | 1-x,1/2+y,3/2-z     |
|                                                   | N <sub>2</sub> -H <sub>2</sub> A···O <sub>1</sub>   | 0.860                                             | 1.97(2)  | 2.83(3)  | 177      | x, y, z             |
|                                                   | N <sub>2</sub> -H <sub>2</sub> B···O <sub>2</sub>   | 0.860                                             | 2.11(2)  | 2.94(2)  | 164      | 1-x,1/2+y,3/2-z     |
|                                                   | N <sub>3</sub> -H <sub>3</sub> A···O <sub>3</sub>   | 0.860                                             | 2.18(2)  | 2.99(3)  | 157      | -1/2+x,y,3/2-z      |



|               |                                                   |       |         |          |     |                  |
|---------------|---------------------------------------------------|-------|---------|----------|-----|------------------|
|               | N <sub>3</sub> -H <sub>3</sub> B...O <sub>2</sub> | 0.860 | 2.08(2) | 2.94(3)  | 172 | x, y, z          |
|               | N <sub>1</sub> -H <sub>1</sub> A...O <sub>3</sub> | 0.880 | 2.04(2) | 2.90 (3) | 176 | x, y, z          |
|               | N <sub>1</sub> -H <sub>1</sub> B...O <sub>1</sub> | 0.880 | 2.08(2) | 2.94(2)  | 170 | 3/2-x,1/2+y,z    |
|               | N <sub>2</sub> -H <sub>2</sub> A...O <sub>3</sub> | 0.880 | 2.07(2) | 2.93(3)  | 172 | 3/2-x,1/2+y,z    |
| <b>GNPS▷7</b> | N <sub>2</sub> -H <sub>2</sub> B...O <sub>2</sub> | 0.880 | 2.08(2) | 2.94(3)  | 176 | 1-x,1/2+y,3/2-z  |
|               | N <sub>3</sub> -H <sub>3</sub> A...O <sub>2</sub> | 0.880 | 2.16(2) | 2.99(3)  | 165 | x, y, z          |
|               | N <sub>3</sub> -H <sub>3</sub> B...O <sub>1</sub> | 0.880 | 2.17(2) | 3.02(3)  | 169 | 1-x,1/2+y,3/2-z  |
|               | C <sub>5</sub> -H <sub>5</sub> ...O <sub>2</sub>  | 0.930 | 2.57(2) | 3.44(4)  | 155 | 1-x,-1/2+y,3/2-z |
|               | N <sub>1</sub> -H <sub>1</sub> A...O <sub>3</sub> | 0.860 | 2.13(2) | 2.96(3)  | 162 | 1-x,1/2+y,1/2-z  |
|               | N <sub>1</sub> -H <sub>1</sub> B...O <sub>4</sub> | 0.860 | 2.11(2) | 2.94(3)  | 164 | x, y, z          |
|               | N <sub>1</sub> -H <sub>1</sub> B...O <sub>7</sub> | 0.860 | 2.54(2) | 2.97(3)  | 112 | 1/2+x,1/2-y,1-z  |
|               | N <sub>2</sub> -H <sub>2</sub> A...O <sub>1</sub> | 0.860 | 2.17(2) | 2.99(3)  | 160 | 1-x,1/2+y,1/2-z  |
|               | N <sub>2</sub> -H <sub>2</sub> B...O <sub>3</sub> | 0.860 | 2.16(2) | 2.99(3)  | 163 | 1/2-x,1-y,1/2+z  |
|               | N <sub>3</sub> -H <sub>3</sub> A...O <sub>6</sub> | 0.860 | 2.20(2) | 2.98(3)  | 150 | x, y, z          |
|               | N <sub>3</sub> -H <sub>3</sub> B...O <sub>2</sub> | 0.860 | 2.14(2) | 2.96(3)  | 159 | 1/2-x,1-y,1/2+z  |
| <b>GNPS▷8</b> | N <sub>4</sub> -H <sub>4</sub> A...O <sub>5</sub> | 0.860 | 2.14(2) | 2.97(4)  | 162 | -1/2+x,1/2-y,1-z |
|               | N <sub>4</sub> -H <sub>4</sub> B...O <sub>6</sub> | 0.860 | 2.12(2) | 2.97(3)  | 171 | x, y, z          |
|               | N <sub>5</sub> -H <sub>5</sub> A...O <sub>2</sub> | 0.860 | 2.06(2) | 2.92(3)  | 177 | 1-x,-1/2+y,1/2-z |
|               | N <sub>5</sub> -H <sub>5</sub> B...O <sub>5</sub> | 0.860 | 2.02(2) | 2.88(3)  | 174 | x, y, z          |
|               | N <sub>6</sub> -H <sub>6</sub> A...O <sub>4</sub> | 0.860 | 2.19(2) | 3.01(4)  | 159 | -1/2+x,1/2-y,1-z |
|               | N <sub>6</sub> -H <sub>6</sub> B...O <sub>1</sub> | 0.860 | 2.09(2) | 2.94(3)  | 170 | 1-x,-1/2+y,1/2-z |
|               | C <sub>4</sub> -H <sub>4</sub> A...O <sub>2</sub> | 0.970 | 2.56(2) | 3.51(4)  | 168 | 1/2+x,1/2-y,1-z  |
|               | C <sub>4</sub> -H <sub>4</sub> B...O <sub>5</sub> | 0.970 | 2.43(2) | 3.38(4)  | 167 | 3/2-x,-y,1/2+z   |

## 5. Calculation of the Nucleus-independent chemical shift (NICS)

All calculations were carried out using the Gaussian 09 program.<sup>1</sup> All structures were fully optimized at B3LYP/6-31G(d)<sup>2</sup> theoretical level. Vibrational analyses at the same level of theory were performed to confirm each stationary point to a local minimum.<sup>3</sup> Nucleus-independent chemical shift (NICS) values were calculated at the B3LYP-GIAO/6-31G(d) level.

### Molecular Geometries and Energies

B3LYP/6-31G(d) Cartesian coordinates and energies in Hartree

#### biphenyldisulfonic acid

C 0.00000000 0.00000000 0.00000000

|    |             |             |             |
|----|-------------|-------------|-------------|
| C  | 0.00000000  | 0.00000000  | 1.40729132  |
| C  | 1.25081179  | 0.00000000  | 2.05183646  |
| C  | 2.44193722  | -0.00455432 | 1.32680587  |
| C  | 2.42335968  | -0.01222843 | -0.07006705 |
| C  | 1.19005261  | -0.00623179 | -0.72652768 |
| H  | -0.95004069 | 0.03850066  | -0.52852720 |
| H  | 1.28525945  | -0.01802793 | 3.13899543  |
| H  | 3.40254005  | 0.00757917  | 1.83306568  |
| H  | 1.18018789  | 0.02280814  | -1.81202031 |
| C  | -1.26965147 | 0.01036126  | 2.18140486  |
| C  | -2.40587569 | -0.68887643 | 1.73415799  |
| C  | -1.38727260 | 0.72811037  | 3.38617470  |
| C  | -3.59843066 | -0.67559878 | 2.45672719  |
| H  | -2.34244657 | -1.26811335 | 0.81552444  |
| C  | -2.57843508 | 0.74111471  | 4.11079142  |
| H  | -0.53892712 | 1.31017552  | 3.73960184  |
| C  | -3.69523212 | 0.03614239  | 3.65493918  |
| H  | -4.47368512 | -1.20854612 | 2.09742123  |
| H  | -2.66837644 | 1.32111273  | 5.02443672  |
| S  | -5.23290732 | 0.00078455  | 4.63376560  |
| O  | -5.06479413 | -1.16402525 | 5.54657939  |
| O  | -5.25118057 | 1.31793566  | 5.32966020  |
| S  | 3.97867696  | -0.08452624 | -1.01851713 |
| O  | 4.96855351  | 0.60922153  | -0.14771736 |
| O  | 4.24004792  | -1.54051984 | -1.19183992 |
| O  | -6.30744876 | -0.17632003 | 3.61718878  |
| O  | 3.66406974  | 0.62962990  | -2.28756935 |
| Bq | 1.21769355  | -0.00383576 | 0.66488982  |
| Bq | 1.21625068  | -1.00383080 | 0.66768988  |

B3LYP/6-31G(d) Total Energy: -1709.792815

**1,5-naphthalenedisulfonic acid**

|    |             |             |             |
|----|-------------|-------------|-------------|
| C  | 0.00000000  | 0.00000000  | 0.00000000  |
| C  | 0.00000000  | 0.00000000  | 1.38070492  |
| C  | 1.25040942  | 0.00000000  | 2.08857471  |
| C  | 2.49291000  | 0.00000000  | 1.33111206  |
| C  | 2.42349579  | 0.00000000  | -0.08986063 |
| C  | 1.20516009  | 0.00000000  | -0.72988507 |
| H  | 0.38621705  | 0.00000000  | 4.05836823  |
| H  | -0.95194893 | -0.00000000 | -0.52195941 |
| C  | 1.31982363  | 0.00000000  | 3.50954741  |
| C  | 3.74331942  | 0.00000000  | 2.03898185  |
| H  | 3.35710237  | 0.00000000  | -0.63868145 |
| H  | 1.16893873  | 0.00000000  | -1.81915966 |
| C  | 3.74331942  | 0.00000000  | 3.41968677  |
| C  | 2.53815933  | -0.00000000 | 4.14957185  |
| H  | 4.69526835  | 0.00000000  | 3.94164618  |
| H  | 2.57438069  | 0.00000000  | 5.23884643  |
| S  | 5.45025032  | 0.00000000  | 1.31785373  |
| O  | 6.05313264  | 1.24769700  | 1.86543055  |
| O  | 6.05313032  | -1.24770000 | 1.86542570  |
| S  | -1.70693090 | 0.00000000  | 2.10183305  |
| O  | -2.30981197 | 1.24769900  | 1.55426014  |
| O  | -2.30981209 | -1.24769800 | 1.55425815  |
| O  | -1.59457010 | 0.00000000  | 3.58934288  |
| O  | 5.33788952  | -0.00000000 | -0.16965610 |
| Bq | 1.22866256  | 0.00000000  | 0.66344100  |
| Bq | 1.22866256  | -1.00000000 | 0.66344100  |

B3LYP/6-31G(d) Total Energy: -1632.347428

## 6. Guest volume calculations

The volume of guests were performed at 6-311++G(d,p) level using the Gaussian 09 program. The length and width of the guests and host are measured by diamond.

Cartesian coordinates (Å) for the optimized geometries of **1**

|   |             |             |             |
|---|-------------|-------------|-------------|
| C | -2.02270000 | -0.53480000 | -1.11620000 |
| C | -1.48970000 | -1.66540000 | -0.21880000 |
| C | 0.04430000  | -1.73710000 | -0.27130000 |
| C | 0.67220000  | -0.39270000 | 0.13330000  |
| C | 0.14330000  | 0.72740000  | -0.76550000 |
| C | -1.38230000 | 0.80610000  | -0.71750000 |
| O | 0.67970000  | 1.96130000  | -0.34860000 |
| C | -3.55630000 | -0.45460000 | -1.04940000 |
| C | 2.19110000  | -0.44140000 | 0.15790000  |
| C | 2.87700000  | -0.08560000 | 1.25700000  |
| C | 2.91780000  | -0.88000000 | -1.09180000 |
| H | -1.73460000 | -0.76050000 | -2.17410000 |
| H | -1.81820000 | -1.49380000 | 0.83330000  |
| H | -1.92160000 | -2.64260000 | -0.54150000 |
| H | 0.40810000  | -2.54580000 | 0.40660000  |
| H | 0.34880000  | -2.00830000 | -1.30920000 |
| H | 0.31490000  | -0.17080000 | 1.17000000  |
| H | 0.46920000  | 0.57390000  | -1.81950000 |
| H | -1.70960000 | 1.08070000  | 0.31290000  |
| H | -1.73640000 | 1.61410000  | -1.40080000 |
| H | 0.43320000  | 2.64260000  | -0.97820000 |
| H | -4.02330000 | -1.41570000 | -1.36430000 |

|   |             |             |             |
|---|-------------|-------------|-------------|
| H | -3.90390000 | -0.22970000 | -0.01570000 |
| H | -3.94680000 | 0.34340000  | -1.72140000 |
| H | 3.97640000  | -0.11070000 | 1.28230000  |
| H | 2.36860000  | 0.24680000  | 2.17410000  |
| H | 2.68430000  | -1.94060000 | -1.33280000 |
| H | 2.63570000  | -0.24550000 | -1.96050000 |
| H | 4.02330000  | -0.81030000 | -0.98570000 |

Cartesian coordinates (Å) for the optimized geometries of **2**

|   |             |             |             |
|---|-------------|-------------|-------------|
| C | -0.85260000 | -0.62000000 | -0.57720000 |
| C | 0.57590000  | -0.65240000 | -0.01490000 |
| C | 1.33250000  | 0.65930000  | -0.31140000 |
| C | 0.50620000  | 1.84410000  | 0.23480000  |
| C | -0.90550000 | 1.89290000  | -0.36330000 |
| C | -1.66160000 | 0.58660000  | -0.07280000 |
| C | 1.75390000  | 0.80980000  | -1.79900000 |
| O | 0.49350000  | -0.86800000 | 1.36670000  |
| C | 2.38890000  | 2.18070000  | -2.10590000 |
| C | 2.75160000  | -0.28250000 | -2.23660000 |
| C | 1.42110000  | -1.56400000 | 2.08790000  |
| C | 2.57980000  | -2.17390000 | 1.31470000  |
| O | 1.32870000  | -1.70140000 | 3.29030000  |
| C | -3.06560000 | 0.61190000  | -0.69820000 |
| H | -0.82020000 | -0.59820000 | -1.69100000 |
| H | -1.38340000 | -1.56350000 | -0.30430000 |
| H | 1.06800000  | -1.52720000 | -0.48870000 |
| H | 2.28950000  | 0.65380000  | 0.26860000  |
| H | 1.02840000  | 2.81400000  | 0.07730000  |
| H | 0.41440000  | 1.75820000  | 1.34380000  |
| H | -0.84640000 | 2.06300000  | -1.46280000 |

|   |             |             |             |
|---|-------------|-------------|-------------|
| H | -1.46590000 | 2.75670000  | 0.06740000  |
| H | -1.78320000 | 0.49100000  | 1.03570000  |
| H | 0.85080000  | 0.71760000  | -2.45010000 |
| H | 2.77660000  | 2.22650000  | -3.14890000 |
| H | 1.65590000  | 3.01360000  | -2.02550000 |
| H | 3.24140000  | 2.39080000  | -1.42090000 |
| H | 3.08010000  | -0.13330000 | -3.29030000 |
| H | 2.31530000  | -1.30400000 | -2.20200000 |
| H | 3.66350000  | -0.27380000 | -1.59770000 |
| H | 2.23430000  | -3.01360000 | 0.67090000  |
| H | 3.13310000  | -1.42110000 | 0.71310000  |
| H | 3.32290000  | -2.60770000 | 2.02180000  |
| H | -3.66350000 | 1.46770000  | -0.30960000 |
| H | -3.01240000 | 0.70950000  | -1.80620000 |
| H | -3.62640000 | -0.32190000 | -0.46500000 |

Cartesian coordinates (Å) for the optimized geometries of **3**

|   |             |             |             |
|---|-------------|-------------|-------------|
| C | -1.90210000 | -0.35830000 | 0.00080000  |
| C | -0.55340000 | -0.28440000 | 0.00050000  |
| C | 0.16800000  | 0.85310000  | 0.00040000  |
| C | -0.53460000 | 1.99740000  | 0.00060000  |
| C | -1.87350000 | 1.96310000  | 0.00080000  |
| C | -2.57490000 | 0.81610000  | 0.00100000  |
| O | -3.93080000 | 0.91440000  | 0.00100000  |
| O | -2.42680000 | -1.63310000 | 0.00080000  |
| C | 1.51610000  | 0.78950000  | 0.00020000  |
| C | 2.38690000  | 1.81360000  | 0.00000000  |
| C | 3.88400000  | 1.63310000  | -0.00030000 |
| C | -3.80940000 | -1.88380000 | 0.00040000  |
| H | -0.01790000 | -1.25160000 | 0.00040000  |

|   |             |             |             |
|---|-------------|-------------|-------------|
| H | -0.05550000 | 2.98840000  | 0.00050000  |
| H | -2.42480000 | 2.92000000  | 0.00080000  |
| H | -4.32560000 | 0.03370000  | -0.00140000 |
| H | 1.98390000  | -0.21140000 | 0.00010000  |
| H | 2.05360000  | 2.86310000  | 0.00010000  |
| H | 4.19160000  | 0.56380000  | -0.00030000 |
| H | 4.32530000  | 2.11310000  | -0.90340000 |
| H | 4.32560000  | 2.11310000  | 0.90270000  |
| H | -3.94970000 | -2.98840000 | 0.00070000  |
| H | -4.27510000 | -1.48980000 | 0.93100000  |
| H | -4.27430000 | -1.49060000 | -0.93100000 |

Cartesian coordinates (Å) for the optimized geometries of **4**

|   |             |             |             |
|---|-------------|-------------|-------------|
| C | -1.01780000 | 1.05360000  | 0.00020000  |
| C | -1.04110000 | -0.29120000 | 0.00020000  |
| C | 0.12920000  | -0.96450000 | 0.00030000  |
| C | 1.30900000  | -0.30900000 | 0.00030000  |
| C | 1.29570000  | 1.03660000  | 0.00030000  |
| C | 0.14400000  | 1.72020000  | 0.00030000  |
| C | -2.37690000 | -1.00640000 | 0.00010000  |
| C | 2.66430000  | -0.98710000 | 0.00030000  |
| N | 0.08960000  | -2.23310000 | 0.00030000  |
| H | -1.95820000 | 1.62900000  | 0.00010000  |
| H | 2.24680000  | 1.59530000  | 0.00030000  |
| H | 0.15220000  | 2.82310000  | 0.00030000  |
| H | -3.24230000 | -0.30690000 | 0.00020000  |
| H | -2.48070000 | -1.64390000 | -0.90730000 |
| H | -2.48080000 | -1.64420000 | 0.90730000  |
| H | 2.64160000  | -2.09590000 | 0.00070000  |
| H | 3.24200000  | -0.68150000 | -0.90200000 |

|   |             |             |            |
|---|-------------|-------------|------------|
| H | 3.24230000  | -0.68110000 | 0.90240000 |
| H | 0.95390000  | -2.82310000 | 0.00030000 |
| H | -0.82460000 | -2.74570000 | 0.00020000 |

Cartesian coordinates (Å) for the optimized geometries of **5**

|   |             |             |             |
|---|-------------|-------------|-------------|
| C | -1.05790000 | -1.86570000 | 0.00040000  |
| C | 0.27970000  | -1.79050000 | 0.00060000  |
| C | 0.90070000  | -0.59990000 | 0.00500000  |
| C | 0.09350000  | 0.47470000  | 0.00920000  |
| C | -1.25670000 | 0.43320000  | 0.00960000  |
| C | -1.86220000 | -0.78280000 | 0.00410000  |
| O | -3.23290000 | -0.88490000 | 0.00450000  |
| C | 2.24940000  | -0.55670000 | 0.00520000  |
| C | 3.04010000  | 0.53040000  | 0.00950000  |
| C | 4.54650000  | 0.46310000  | 0.00960000  |
| O | -1.87820000 | 1.66600000  | 0.01370000  |
| C | -3.27870000 | 1.79610000  | 0.00170000  |
| C | -3.84940000 | -2.15140000 | 0.00730000  |
| H | -1.47670000 | -2.88450000 | -0.00330000 |
| H | 0.85440000  | -2.73340000 | -0.00280000 |
| H | 0.53320000  | 1.48510000  | 0.01280000  |
| H | 2.79140000  | -1.51950000 | 0.00150000  |
| H | 2.62920000  | 1.55200000  | 0.01330000  |
| H | 4.93380000  | -0.58000000 | 0.00760000  |
| H | 4.95080000  | 0.97670000  | -0.89240000 |
| H | 4.95040000  | 0.97310000  | 0.91380000  |
| H | -3.51290000 | 2.88450000  | 0.00120000  |
| H | -3.70420000 | 1.36550000  | -0.93120000 |
| H | -3.72020000 | 1.36360000  | 0.92620000  |
| H | -4.95080000 | -1.98970000 | 0.01040000  |



|   |             |             |             |
|---|-------------|-------------|-------------|
| H | -3.58880000 | -2.71340000 | -0.91710000 |
| H | -3.58330000 | -2.71180000 | 0.93120000  |

Cartesian coordinates (Å) for the optimized geometries of **6**

|   |             |             |             |
|---|-------------|-------------|-------------|
| C | -0.83440000 | 1.07790000  | 0.31240000  |
| C | -0.84360000 | -0.24390000 | 0.06140000  |
| C | 0.34770000  | -0.87910000 | -0.03500000 |
| C | 1.52140000  | -0.22940000 | 0.13430000  |
| C | 1.47650000  | 1.09050000  | 0.39660000  |
| C | 0.31290000  | 1.74570000  | 0.48270000  |
| C | -2.17490000 | -0.97310000 | -0.12500000 |
| C | 2.89830000  | -0.88800000 | 0.04270000  |
| N | 0.35490000  | -2.12110000 | -0.29470000 |
| C | 3.14040000  | -1.93330000 | 1.14510000  |
| C | 3.22190000  | -1.40790000 | -1.36850000 |
| C | -3.38680000 | -0.33350000 | 0.57950000  |
| C | -2.47130000 | -1.13390000 | -1.62600000 |
| H | -1.76810000 | 1.65560000  | 0.38190000  |
| H | 2.40310000  | 1.67070000  | 0.54070000  |
| H | 0.30010000  | 2.82930000  | 0.68930000  |
| H | -2.09470000 | -1.98620000 | 0.34310000  |
| H | 3.67490000  | -0.10090000 | 0.23290000  |
| H | 1.24370000  | -2.66400000 | -0.38180000 |
| H | -0.52490000 | -2.66780000 | -0.44590000 |
| H | 4.19250000  | -2.29980000 | 1.12160000  |
| H | 2.96380000  | -1.49270000 | 2.15340000  |
| H | 2.49050000  | -2.82930000 | 1.05600000  |
| H | 4.27500000  | -1.76740000 | -1.42820000 |
| H | 3.10300000  | -0.59800000 | -2.12490000 |
| H | 2.57860000  | -2.25550000 | -1.68620000 |

|   |             |             |             |
|---|-------------|-------------|-------------|
| H | -4.27500000 | -1.00500000 | 0.52780000  |
| H | -3.17910000 | -0.15060000 | 1.65890000  |
| H | -3.69860000 | 0.62490000  | 0.10790000  |
| H | -3.41590000 | -1.70030000 | -1.79270000 |
| H | -1.66000000 | -1.68470000 | -2.15340000 |
| H | -2.57860000 | -0.14030000 | -2.11810000 |

Cartesian coordinates (Å) for the optimized geometries of **7**

|   |             |             |             |
|---|-------------|-------------|-------------|
| C | -1.89200000 | -0.60350000 | 1.56210000  |
| C | -1.93140000 | -1.93120000 | 1.40540000  |
| C | -1.08000000 | -2.50480000 | 0.54570000  |
| C | -0.18060000 | -1.80380000 | -0.17260000 |
| C | -0.14410000 | -0.45740000 | -0.01080000 |
| C | -1.00540000 | 0.11430000  | 0.85770000  |
| C | 0.72040000  | 0.37210000  | -0.67870000 |
| O | 0.70020000  | 1.73210000  | -0.46310000 |
| O | 1.52360000  | -0.06730000 | -1.47490000 |
| C | 1.60500000  | 2.54780000  | -1.17000000 |
| O | 0.62120000  | -2.52600000 | -1.00910000 |
| H | -2.58400000 | -0.10950000 | 2.26480000  |
| H | -2.65270000 | -2.54080000 | 1.97450000  |
| H | -1.12210000 | -3.60140000 | 0.42470000  |
| H | -1.02560000 | 1.20300000  | 1.03400000  |
| H | 1.42970000  | 3.60140000  | -0.85700000 |
| H | 2.65270000  | 2.27250000  | -0.91430000 |
| H | 1.42060000  | 2.46860000  | -2.26480000 |
| H | 1.25530000  | -2.00810000 | -1.51810000 |

Cartesian coordinates (Å) for the optimized geometries of **8**

|   |             |             |             |
|---|-------------|-------------|-------------|
| C | -1.32830000 | -0.22090000 | -0.74000000 |
|---|-------------|-------------|-------------|

|   |             |             |             |
|---|-------------|-------------|-------------|
| C | -0.48070000 | -1.46330000 | -1.03130000 |
| C | 0.98880000  | -1.14730000 | -1.02820000 |
| C | 1.52510000  | 0.07000000  | -1.22020000 |
| C | 0.73100000  | 1.14790000  | -1.46340000 |
| C | -0.77940000 | 0.96860000  | -1.53520000 |
| C | -1.46000000 | 0.06660000  | 0.74920000  |
| C | -2.65550000 | -0.00140000 | 1.35990000  |
| C | -0.22650000 | 0.42650000  | 1.54330000  |
| O | 1.18810000  | 2.25710000  | -1.64140000 |
| C | 3.02620000  | 0.25700000  | -1.17280000 |
| H | -2.35880000 | -0.43160000 | -1.12540000 |
| H | -0.71060000 | -2.25710000 | -0.28250000 |
| H | -0.71990000 | -1.87590000 | -2.04050000 |
| H | 1.65930000  | -2.00740000 | -0.85970000 |
| H | -1.29400000 | 1.90240000  | -1.20730000 |
| H | -1.01470000 | 0.83150000  | -2.61860000 |
| H | -2.76510000 | 0.20200000  | 2.43540000  |
| H | -3.57360000 | -0.26310000 | 0.81360000  |
| H | 0.23510000  | 1.36090000  | 1.15520000  |
| H | -0.44960000 | 0.60490000  | 2.61860000  |
| H | 0.52260000  | -0.39470000 | 1.50570000  |
| H | 3.57360000  | -0.68980000 | -0.96780000 |
| H | 3.40330000  | 0.64770000  | -2.14530000 |
| H | 3.30370000  | 0.97350000  | -0.36630000 |

Cartesian coordinates (Å) for the optimized geometries of  **$\alpha$ -caryophyllene**

|   |             |             |             |
|---|-------------|-------------|-------------|
| C | -2.77560000 | 1.05720000  | -0.57110000 |
| C | -2.31010000 | -0.30090000 | -1.03370000 |
| C | -2.07350000 | -1.25830000 | 0.14310000  |
| C | -0.52650000 | 1.89120000  | 0.27000000  |

|   |             |             |             |
|---|-------------|-------------|-------------|
| C | -2.01220000 | 2.01680000  | -0.01330000 |
| C | 0.92470000  | -1.25110000 | 1.02230000  |
| C | 1.90720000  | -0.31830000 | 0.27750000  |
| C | 1.26760000  | 0.44030000  | -0.87690000 |
| C | 0.28370000  | 1.35720000  | -0.87990000 |
| C | -1.05230000 | -2.31400000 | -0.22370000 |
| C | 0.24060000  | -2.27980000 | 0.15140000  |
| C | 3.07820000  | -1.16500000 | -0.28190000 |
| C | 2.52640000  | 0.69030000  | 1.27110000  |
| C | -2.63980000 | 3.30450000  | 0.47320000  |
| C | -1.57120000 | -3.41400000 | -1.12200000 |
| H | -3.85900000 | 1.24060000  | -0.67250000 |
| H | -1.38400000 | -0.19050000 | -1.63600000 |
| H | -3.05310000 | -0.73370000 | -1.74390000 |
| H | -1.75180000 | -0.68470000 | 1.03620000  |
| H | -3.02920000 | -1.74010000 | 0.45330000  |
| H | -0.40300000 | 1.32780000  | 1.21590000  |
| H | -0.11290000 | 2.91010000  | 0.46120000  |
| H | 1.47870000  | -1.81240000 | 1.81170000  |
| H | 0.19520000  | -0.65070000 | 1.59800000  |
| H | 1.70800000  | 0.22570000  | -1.86800000 |
| H | 0.03270000  | 1.81530000  | -1.85550000 |
| H | 0.89560000  | -3.09260000 | -0.20610000 |
| H | 2.74290000  | -1.88820000 | -1.05850000 |
| H | 3.85900000  | -0.52420000 | -0.75180000 |
| H | 3.57950000  | -1.75150000 | 0.52100000  |
| H | 3.07880000  | 0.16790000  | 2.08480000  |
| H | 3.24650000  | 1.37020000  | 0.76140000  |
| H | 1.76610000  | 1.33180000  | 1.76530000  |
| H | -3.73620000 | 3.35250000  | 0.29060000  |

|   |             |             |             |
|---|-------------|-------------|-------------|
| H | -2.47880000 | 3.41700000  | 1.56950000  |
| H | -2.18040000 | 4.17650000  | -0.04510000 |
| H | -0.79880000 | -4.17650000 | -1.36640000 |
| H | -2.41680000 | -3.94500000 | -0.62930000 |
| H | -1.93470000 | -2.98990000 | -2.08480000 |

Cartesian coordinates (Å) for the optimized geometries of **β-caryophyllene**

|   |             |             |             |
|---|-------------|-------------|-------------|
| C | -0.77580000 | 0.56340000  | 0.11850000  |
| C | -0.71580000 | -0.57250000 | 1.14320000  |
| C | 0.65020000  | -1.27350000 | 1.24000000  |
| C | 1.29780000  | -1.46980000 | -0.10940000 |
| C | 1.30400000  | 2.11350000  | -0.02890000 |
| C | -0.10660000 | 1.91810000  | 0.47260000  |
| C | 2.34580000  | -0.75790000 | -0.56280000 |
| C | 3.13880000  | 0.32480000  | 0.13270000  |
| C | 2.39100000  | 1.48290000  | 0.81170000  |
| C | 1.62820000  | 2.81310000  | -1.12760000 |
| C | 0.65990000  | -2.54110000 | -0.96770000 |
| C | -1.29560000 | 2.61410000  | -0.24530000 |
| C | -2.12810000 | 1.32680000  | -0.00950000 |
| C | -2.96460000 | 0.88960000  | -1.21780000 |
| C | -2.98670000 | 1.40550000  | 1.26000000  |
| H | -0.44710000 | 0.23250000  | -0.89410000 |
| H | -1.48120000 | -1.32420000 | 0.83250000  |
| H | -1.01120000 | -0.21850000 | 2.15730000  |
| H | 0.53220000  | -2.26760000 | 1.73180000  |
| H | 1.32360000  | -0.71730000 | 1.92270000  |
| H | -0.16150000 | 2.13540000  | 1.56470000  |
| H | 2.72000000  | -1.01620000 | -1.56990000 |
| H | 3.82280000  | -0.16740000 | 0.86400000  |

|   |             |             |             |
|---|-------------|-------------|-------------|
| H | 3.80560000  | 0.77870000  | -0.64170000 |
| H | 1.99110000  | 1.19780000  | 1.80710000  |
| H | 3.13090000  | 2.28240000  | 1.05960000  |
| H | 0.88580000  | 3.30600000  | -1.76720000 |
| H | 2.68010000  | 2.92500000  | -1.43050000 |
| H | 1.15990000  | -2.66490000 | -1.95360000 |
| H | 0.70510000  | -3.52490000 | -0.44840000 |
| H | -0.40780000 | -2.30190000 | -1.17010000 |
| H | -1.67760000 | 3.52490000  | 0.26360000  |
| H | -1.14800000 | 2.78330000  | -1.33340000 |
| H | -3.38590000 | -0.12720000 | -1.04910000 |
| H | -3.81000000 | 1.59450000  | -1.38560000 |
| H | -2.36940000 | 0.85300000  | -2.15730000 |
| H | -3.82280000 | 2.12680000  | 1.11670000  |
| H | -3.43600000 | 0.41510000  | 1.49760000  |
| H | -2.41390000 | 1.74570000  | 2.15030000  |

Cartesian coordinates (Å) for the optimized geometries of **citronellal**

|   |             |             |             |
|---|-------------|-------------|-------------|
| O | -2.83470000 | -2.80240000 | -1.03640000 |
| C | -1.88960000 | -2.60140000 | -1.76420000 |
| C | -0.53570000 | -3.24790000 | -1.53200000 |
| C | 0.62480000  | -2.23250000 | -1.50970000 |
| C | 0.44490000  | -1.21990000 | -0.35990000 |
| C | 1.48960000  | -0.09330000 | -0.34650000 |
| C | 1.16390000  | 0.92700000  | 0.71750000  |
| C | 0.38020000  | 2.01080000  | 0.57250000  |
| C | 0.13240000  | 2.95560000  | 1.72590000  |
| C | 1.96530000  | -2.98210000 | -1.41400000 |
| C | -0.32530000 | 2.39040000  | -0.70750000 |
| H | -1.98450000 | -1.93350000 | -2.65310000 |

|   |             |             |             |
|---|-------------|-------------|-------------|
| H | -0.55090000 | -3.82260000 | -0.57690000 |
| H | -0.38580000 | -3.98330000 | -2.35750000 |
| H | 0.61260000  | -1.67260000 | -2.47890000 |
| H | -0.56390000 | -0.75060000 | -0.44760000 |
| H | 0.46680000  | -1.75840000 | 0.61690000  |
| H | 2.50880000  | -0.49430000 | -0.14060000 |
| H | 1.54920000  | 0.38750000  | -1.34830000 |
| H | 1.59970000  | 0.72540000  | 1.71130000  |
| H | 0.67210000  | 2.66060000  | 2.65310000  |
| H | 0.46640000  | 3.98330000  | 1.45700000  |
| H | -0.95400000 | 2.99040000  | 1.96740000  |
| H | 2.83470000  | -2.29640000 | -1.52260000 |
| H | 2.06070000  | -3.74280000 | -2.22200000 |
| H | 2.06150000  | -3.50970000 | -0.43800000 |
| H | -0.21770000 | 1.64750000  | -1.52510000 |
| H | -1.41750000 | 2.49930000  | -0.51970000 |
| H | 0.06350000  | 3.36450000  | -1.08130000 |

Cartesian coordinates (Å) for the optimized geometries of **citronellol**

|   |             |             |             |
|---|-------------|-------------|-------------|
| O | -4.12940000 | -2.15280000 | 1.79670000  |
| C | -2.90700000 | -1.45880000 | 1.64090000  |
| C | -3.18240000 | 0.03650000  | 1.52690000  |
| C | -1.92340000 | 0.93020000  | 1.52230000  |
| C | -0.95630000 | 0.62730000  | 0.35640000  |
| C | 0.18440000  | -0.33770000 | 0.72760000  |
| C | 1.10240000  | -0.61700000 | -0.43780000 |
| C | 2.33780000  | -1.14310000 | -0.35760000 |
| C | 3.17420000  | -1.37350000 | -1.59490000 |
| C | -2.36280000 | 2.40780000  | 1.47810000  |
| C | 3.00140000  | -1.55220000 | 0.93540000  |

|   |             |             |             |
|---|-------------|-------------|-------------|
| H | -3.95370000 | -3.09530000 | 1.85390000  |
| H | -2.27950000 | -1.69180000 | 2.52980000  |
| H | -2.42460000 | -1.86250000 | 0.72370000  |
| H | -3.77710000 | 0.22710000  | 0.60210000  |
| H | -3.82600000 | 0.33470000  | 2.38990000  |
| H | -1.38180000 | 0.78110000  | 2.48970000  |
| H | -1.53510000 | 0.24400000  | -0.51560000 |
| H | -0.47400000 | 1.57550000  | 0.01680000  |
| H | 0.76790000  | 0.10770000  | 1.56660000  |
| H | -0.22660000 | -1.31270000 | 1.07280000  |
| H | 0.70080000  | -0.38120000 | -1.43740000 |
| H | 2.66410000  | -1.05160000 | -2.52980000 |
| H | 4.12940000  | -0.80570000 | -1.52190000 |
| H | 3.41510000  | -2.45560000 | -1.69990000 |
| H | -1.49010000 | 3.09530000  | 1.56240000  |
| H | -3.04990000 | 2.65540000  | 2.31910000  |
| H | -2.89170000 | 2.64050000  | 0.52590000  |
| H | 2.34390000  | -1.46790000 | 1.82630000  |
| H | 3.32490000  | -2.61600000 | 0.87640000  |
| H | 3.90190000  | -0.92270000 | 1.11650000  |



## 7. Interaction Energies and the energy decomposition analysis (kJ/mol) based on Natural bond orbital (NBO) calculation.

Geometry optimizations of all hydrogen atoms were conducted by DFT using the Gaussian 16 package under the B3LYP-D3/6-311G (d, p) level. All of the heavy atoms were at original X-ray coordinates. Natural bond orbital (NBO) analysis was performed Gaussian NBO Version 3.1. The intermolecular interaction energy and the energy decomposition analysis (EDA) based on SAPT were determined by using the PSI4 1.4 program, and the level of calculation was SAPT0/jun-cc-pVDZ. Five complexes without disorders were included in the calculation. The data of NBO analysis was provided in Table S4

Table S4. Interaction Energies and the energy decomposition analysis (kJ/mol) based on Natural bond orbital (NBO) calculation.

| Complex              | Electrostatics | Exchange    | Induction    | Dispersion   | Total      |
|----------------------|----------------|-------------|--------------|--------------|------------|
| GNPS $\Rightarrow$ 1 | -55.7683127    | 68.8908449  | -46.16308693 | -104.5949559 | -124.51298 |
| GNPS $\Rightarrow$ 2 | -36.04022071   | 96.58079187 | -15.50921039 | -145.9649216 | -100.93356 |
| GNPS $\Rightarrow$ 4 | -41.53464097   | 58.93670727 | -53.43258083 | -87.17874305 | -123.20926 |
| GNPS $\Rightarrow$ 7 | -22.57516253   | 58.30971621 | -16.69081085 | -84.63145939 | -65.587717 |
| GNPS $\Rightarrow$ 8 | -19.8257027    | 60.91535765 | -12.68499158 | -91.12308916 | -62.718426 |

The results of the energy decomposition analysis (kJ/mol) based on Natural bond orbital (NBO) calculation showed that the main interaction between host and guest molecules is the dispersion as attraction effect, similar to C–H $\cdots$  $\pi$  interactions, suggesting again the important role of C–H $\cdots$  $\pi$  interactions. Related figures were shown in Fig 9a-9e.

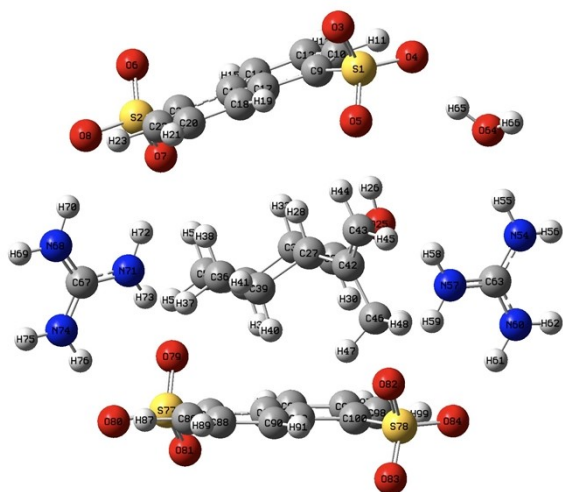

Fig 9a. Extracted structure of the host and guest from GNPS-1

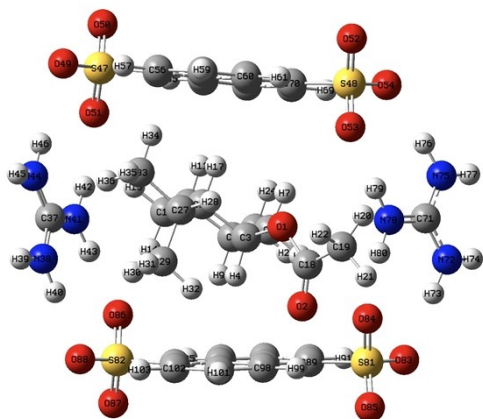

Fig 9b. Extracted structure of the host and guest from GNPS-2

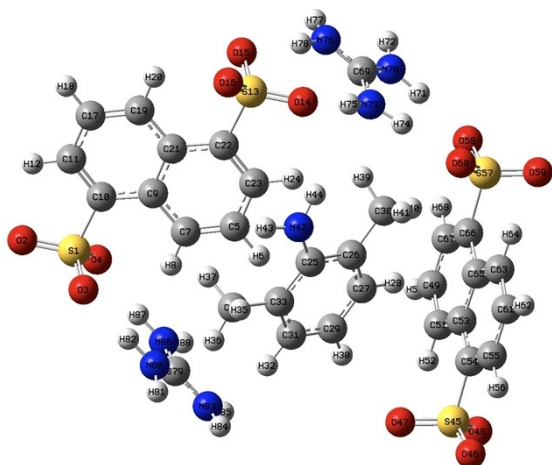

Fig 9c. Extracted structure of the host and guest from GNPS-4

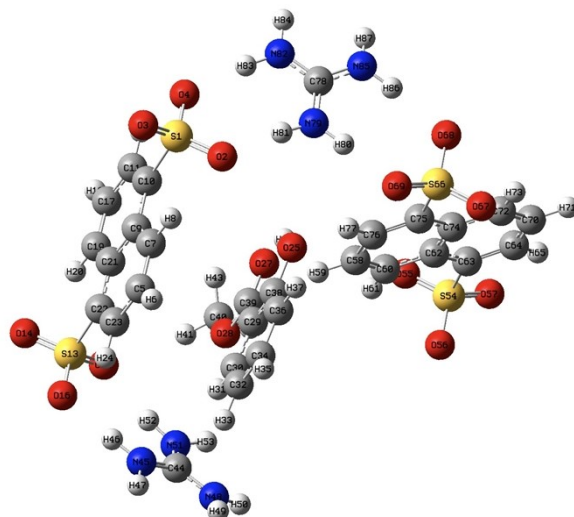

Fig 9d. Extracted structure of the host and guest from GNPS-7

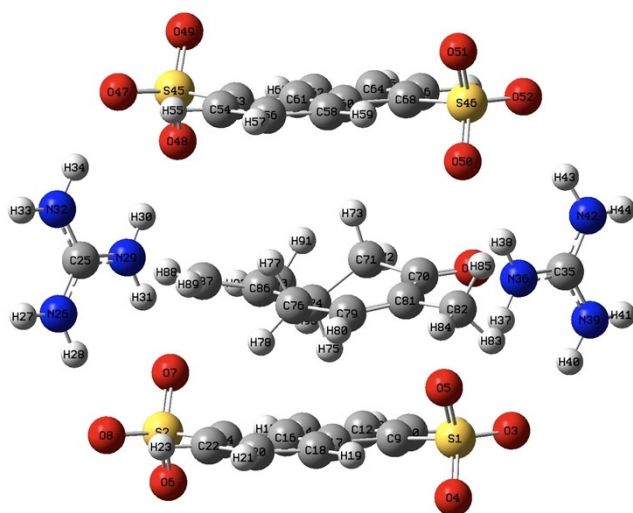

Fig 9e. Extracted structure of the host and guest from GNPS-8

## References

1. M. J. Frisch, G. W. Trucks, H. B. Schlegel, G. E. Scuseria, M. A. Robb, J. R. Cheeseman, G. Scalmani, V. Barone, B. Mennucci, G. A. Petersson, H. Nakatsuji, M. Caricato, X. Li, H. P. Hratchian, A. F. Izmaylov, J. Bloino, G. Zheng, J. L. Sonnenberg, M. Hada, M. Ehara, K. Toyota, R. Fukuda, J. Hasegawa, M. Ishida, T. Nakajima, Y. Honda, O. Kitao, H. Nakai, T. Vreven, J. A. Montgomery Jr, J. E. Peralta, F. Ogliaro, M. Bearpark, J. J. Heyd, E. Brothers, K. N. Kudin, V. N. Staroverov, R. Kobayashi, J. Normand, K. Raghavachari, A. Rendell, J. C. Burant, S. S. Iyengar, J. Tomasi, M. Cossi, N. Rega, J. M. Millam, M. Klene, J. E. Knox, J. B. Cross, V. Bakken, C. Adamo, J. Jaramillo, R. Gomperts, R. E. Stratmann, O. Yazyev, A. J. Austin, R. Cammi, C.

Pomelli, J. W. Ochterski, R. L. Martin, K. Morokuma, V. G. Zakrzewski, G. A. Voth, P. Salvador, J. J. Dannenberg, S. Dapprich, A. D. Daniels, Ö. Farkas, J. B. Foresman, J. V. Ortiz, J. Cioslowski, D. J. Fox, *Gaussian Inc. Wallingford CT*, 2009.

2. (a) A. D. J. Becke. *Chem. Phys.* 1993, **98**, 5648-5652. (b) C. Lee, W. Yang, R. G. Parr. *Phys. Rev. B.* 1988, **37**, 785-789. (c) W. J. Hehre, R. Ditchfield, J. A. J. Pople. *Chem. Phys.* 1972, **56**, 2257.

3. R. F. Ribeiro, A. V. Marenich, C. J. Cramer, D. G. J. Truhlar. *Phys. Chem. B*, 2011, **115**, 14556–14562.
